# Supplementary material for: Global copy number analyses by next generation sequencing provide insight into pig genome variation
Source: PubMed Central journal article supplement (PMC4111851; doi:10.1186/1471-2164-15-593), 2014-07-14

## Supplemental figure legends

**Figure S1. Distribution of WGAC pairwise alignments with identity <99%**

**Figure S2. Distribution of unplaced scaffolds against the proportion of duplicated bases**

**Figure S3. SD contents of different chromosomes for pig reference genome**

**Figure S4. A composite map of CNVs, CNVRs, CNV hotspots and SDs based on the *Sus scrofa* 10.2 genome assembly**

A1, wild boar; C3, Landrace; D4, Duroc; DN1 and DN5, Diannan small-ear pig; M2, Min pig; MS7 and MS8, Meishan pig; R2, Rongchang pig; W1, Daweizi pig; Y2, Yorkshire; Z2 and Z5, Tibetan pig.

**Figure S5. Read depth map around *KIT***

For each individual, the horizontal line indicates the averaged read depth of whole-genome 2-copy copy windows. Read depth of copy windows was painted in different colors according to their values: green for  $\text{average}-2\times\text{STDEV}<\text{RD}<\text{average}+2\times\text{STDEV}$ , red for  $\text{RD}\geq\text{average}+3\times\text{STDEV}$ , blue for  $\text{RD}\leq\text{average}-3\times\text{STDEV}$ , and grey for other RD values. Tracks on the bottom of the figure include human Ensembl proteins, genes, contigs and %GC (showed from top to bottom), sourcing from Ensembl. Ref, the Duroc sow 2-14; A1, wild boar; C3, Landrace; D4, Duroc; DN1 and DN5, Diannan small-ear pig; M2, Min pig; MS7 and MS8, Meishan pig; R2, Rongchang pig; W1, Daweizi pig; Y2, Yorkshire; Z2 and Z5, Tibetan pig.

**Figure S6. Dendrogram of 13 individual pigs from 10 distinct breeds using high density SNP data**

The values at the nodes are the percentages of bootstrap results from 1,000 replications of re-samplings, which indicate the reliability of bootstrap test. A1, wild boar; C3, Landrace; D4, Duroc; DN1 and DN5, Diannan small-ear pig; M2, Min pig; MS7 and MS8, Meishan pig; R2, Rongchang pig; W1, Daweizi pig; Y2, Yorkshire; Z2 and Z5, Tibetan pig.

# Number of pairwise alignments

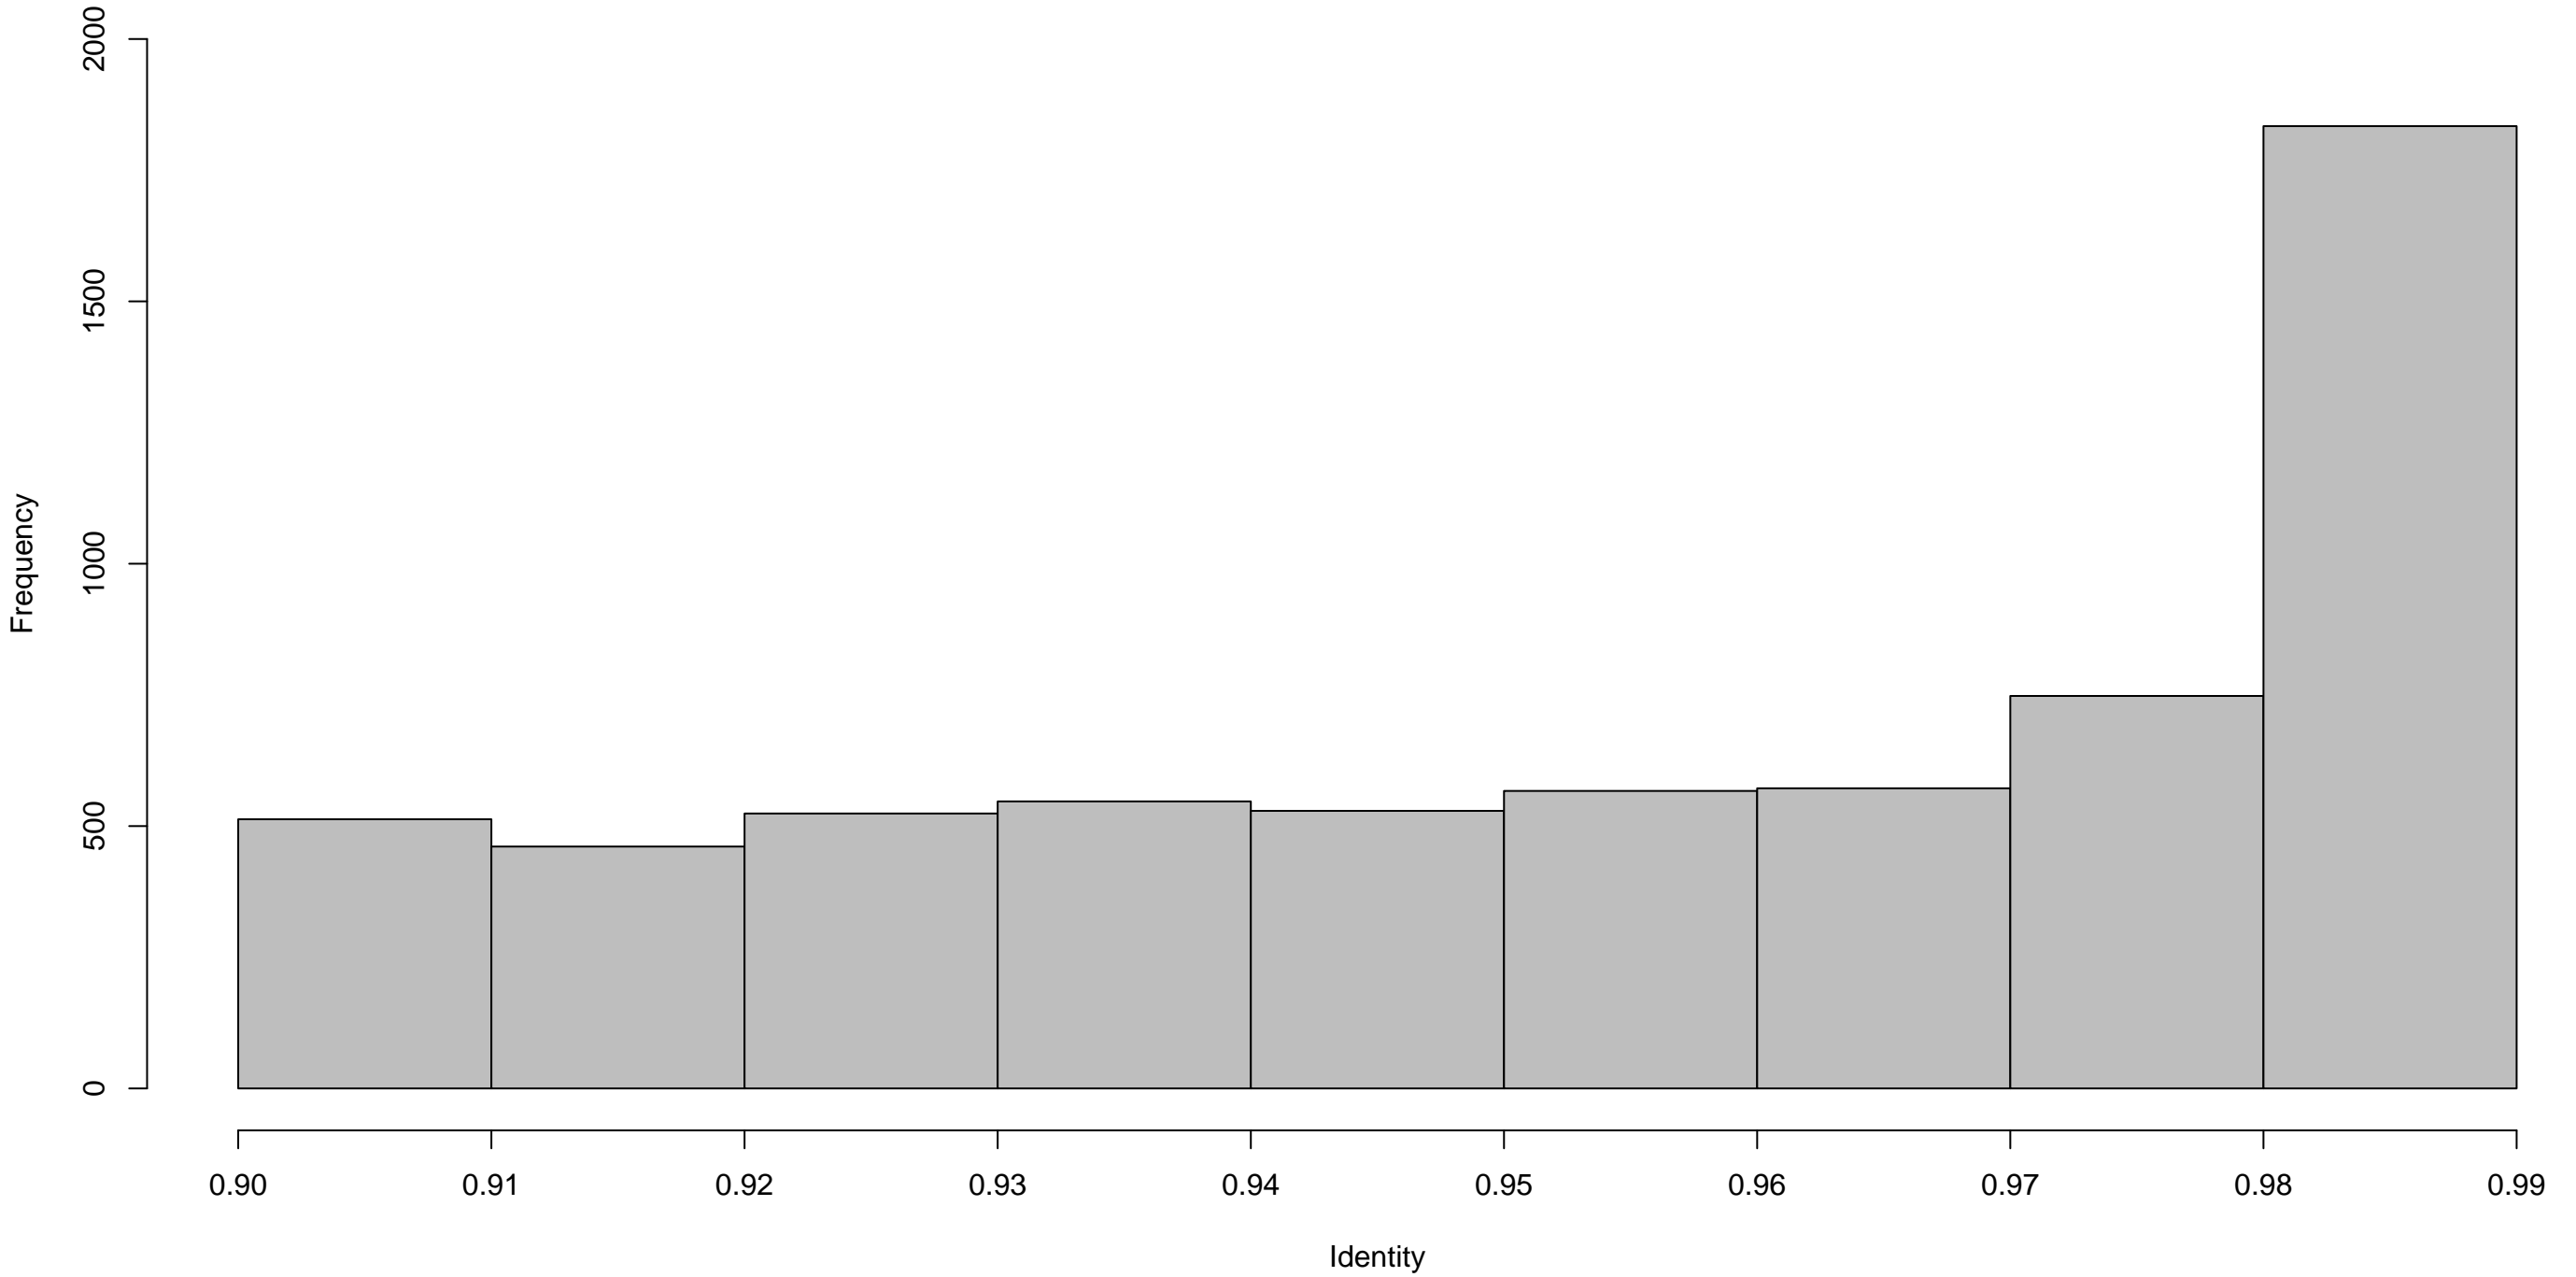

### Number of unplaced scaffolds

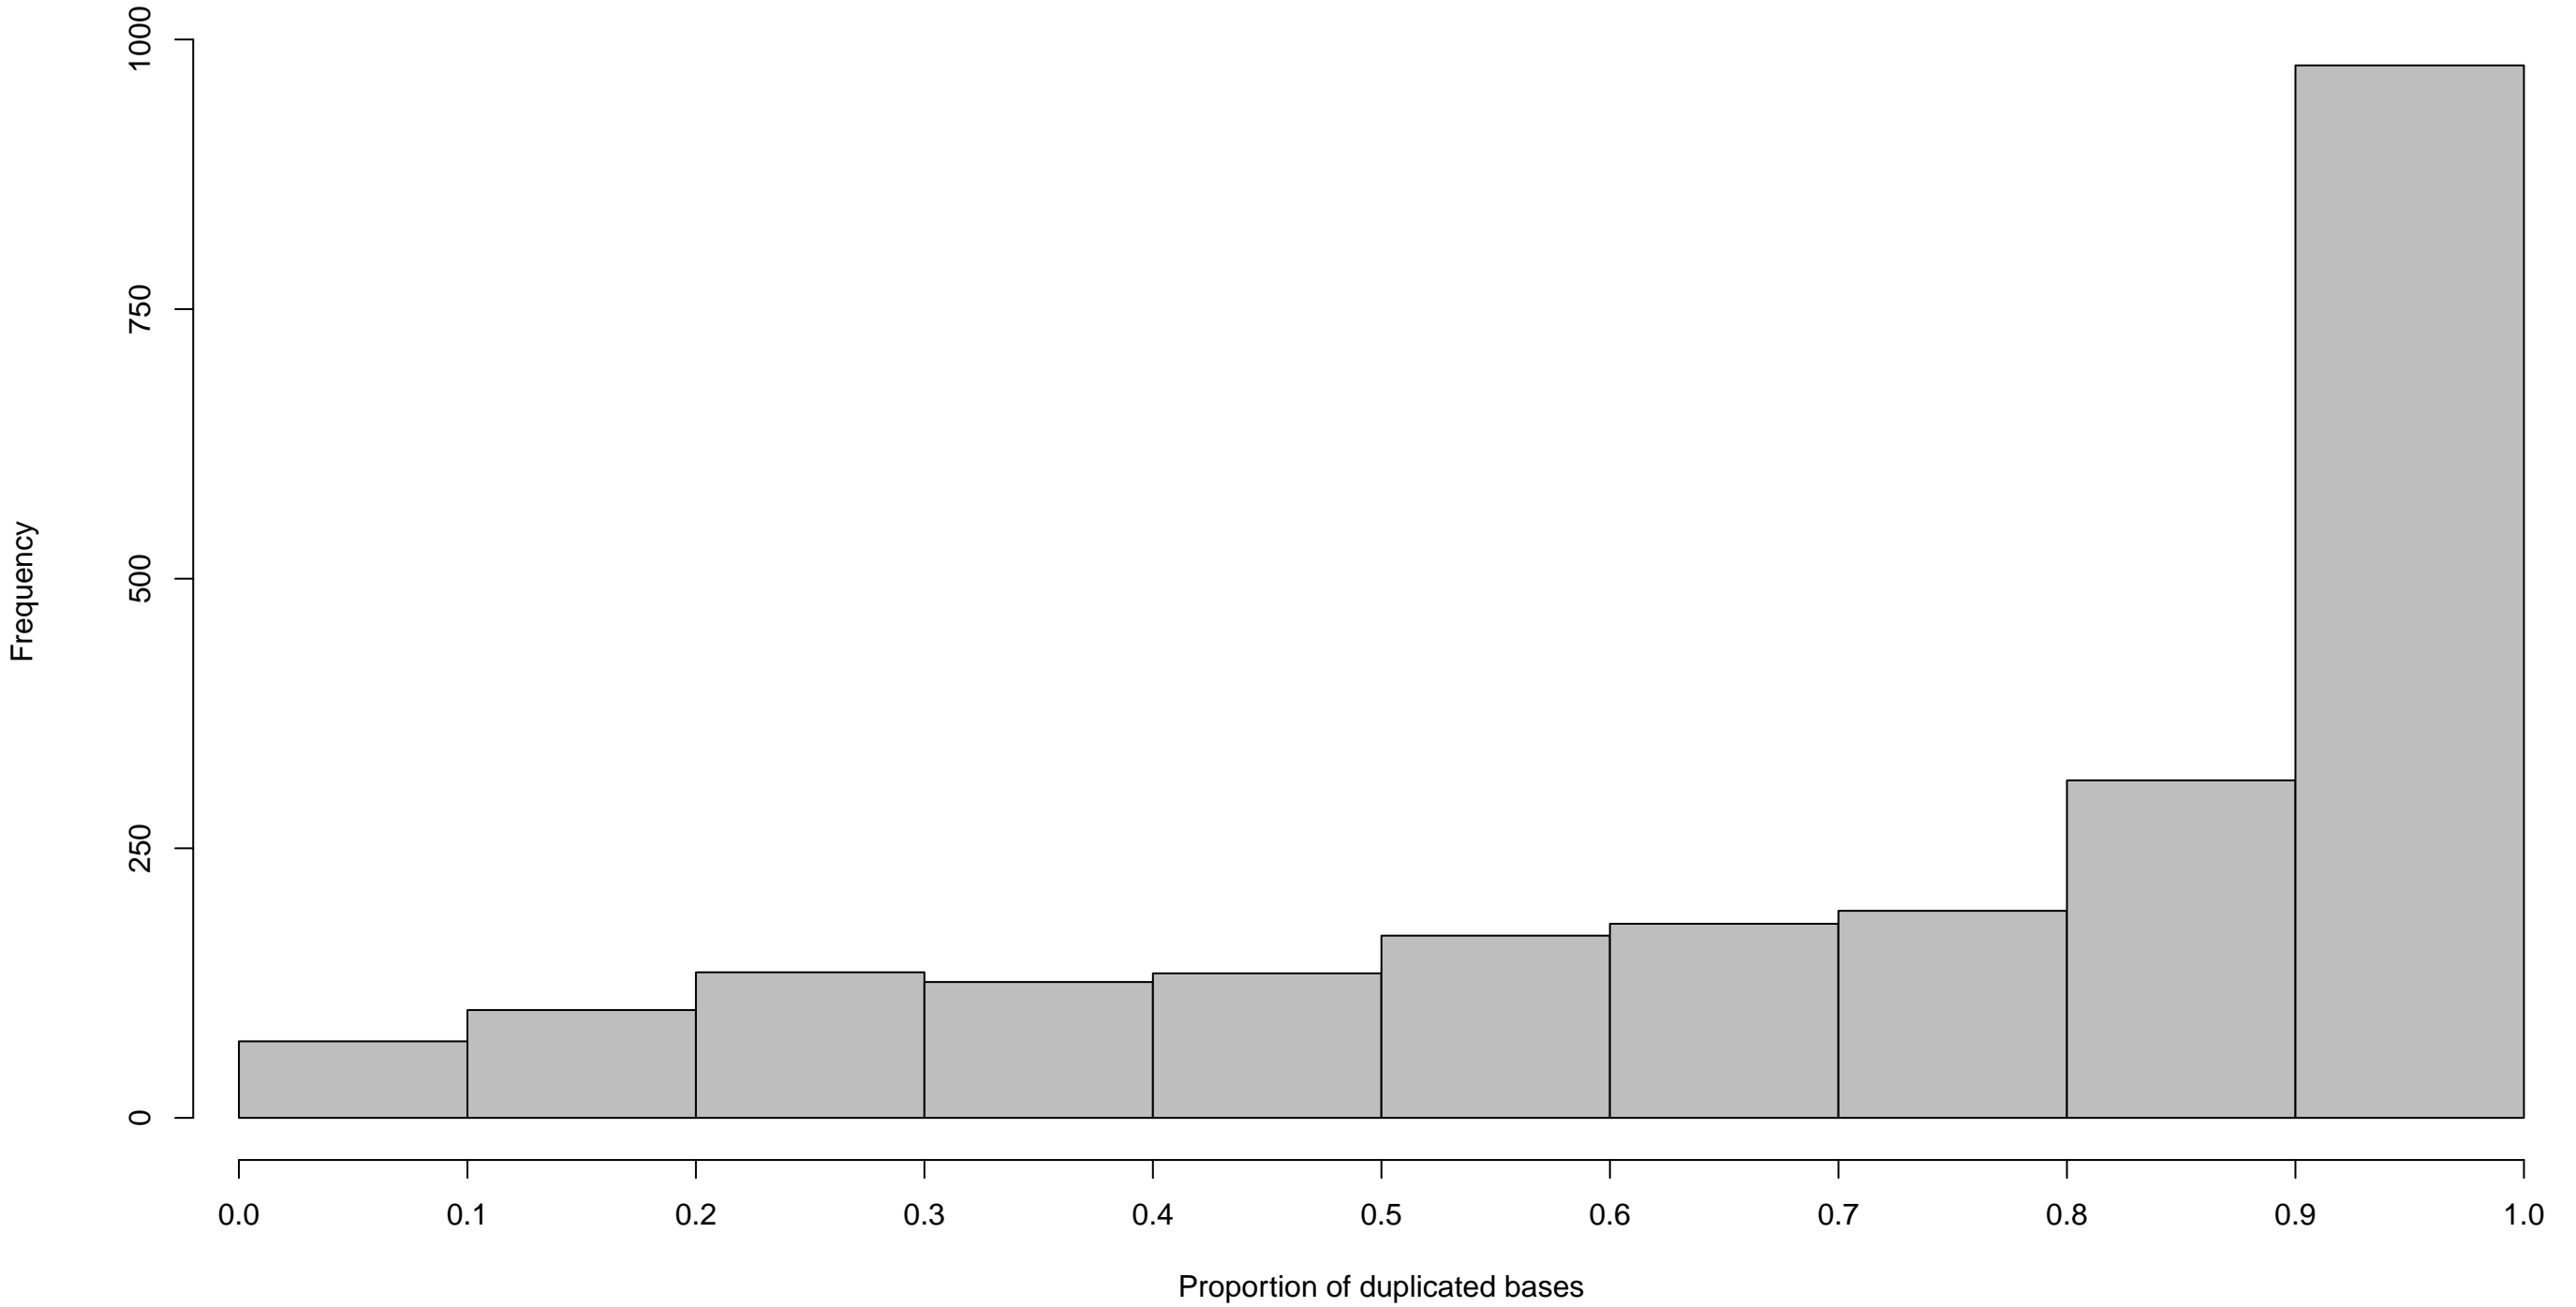

## SD content of different chromosomes

Figure S3

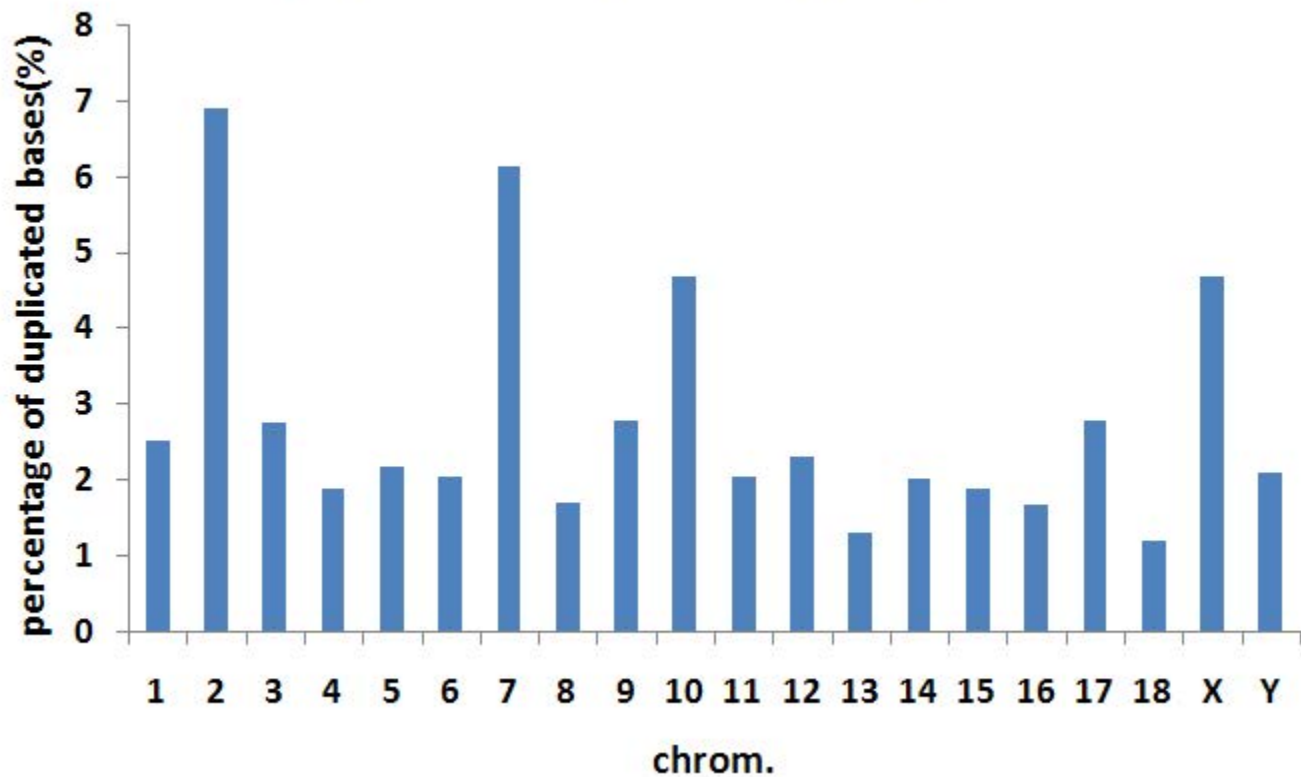

Figure S4\_chr1

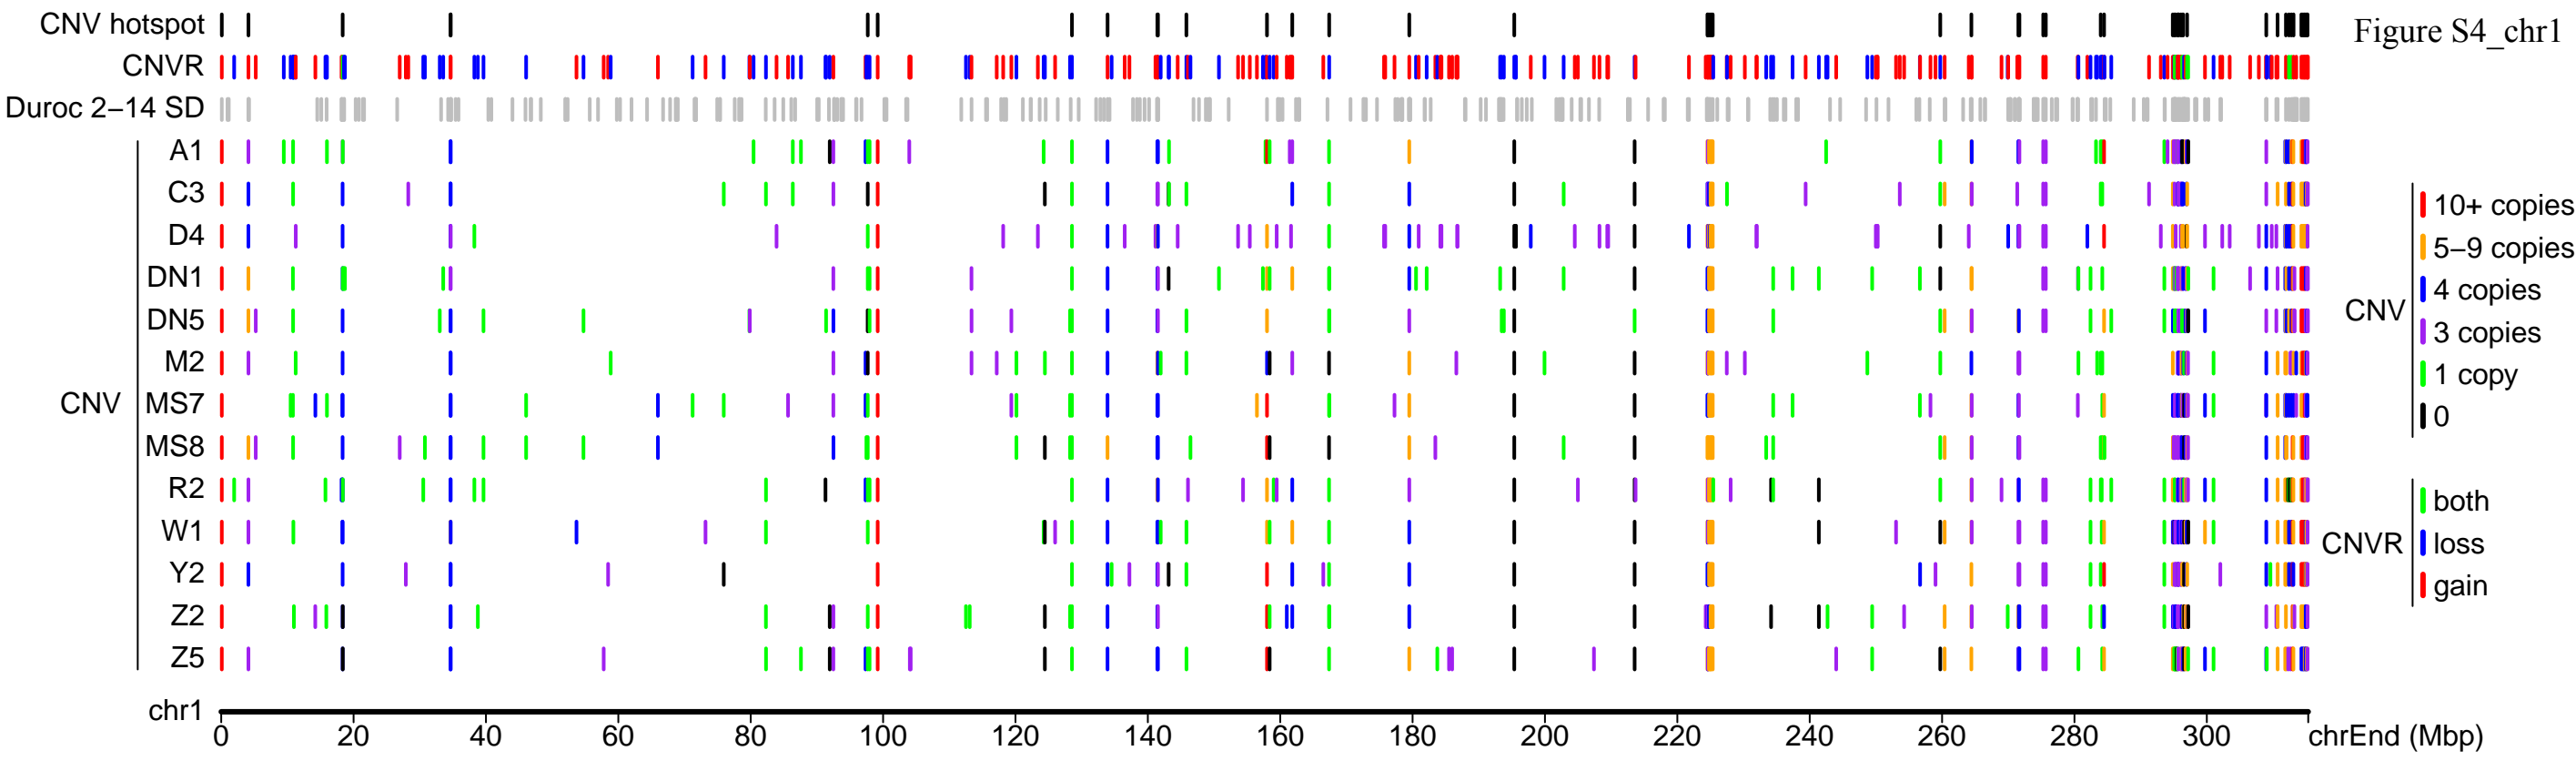

Figure S4\_chr2

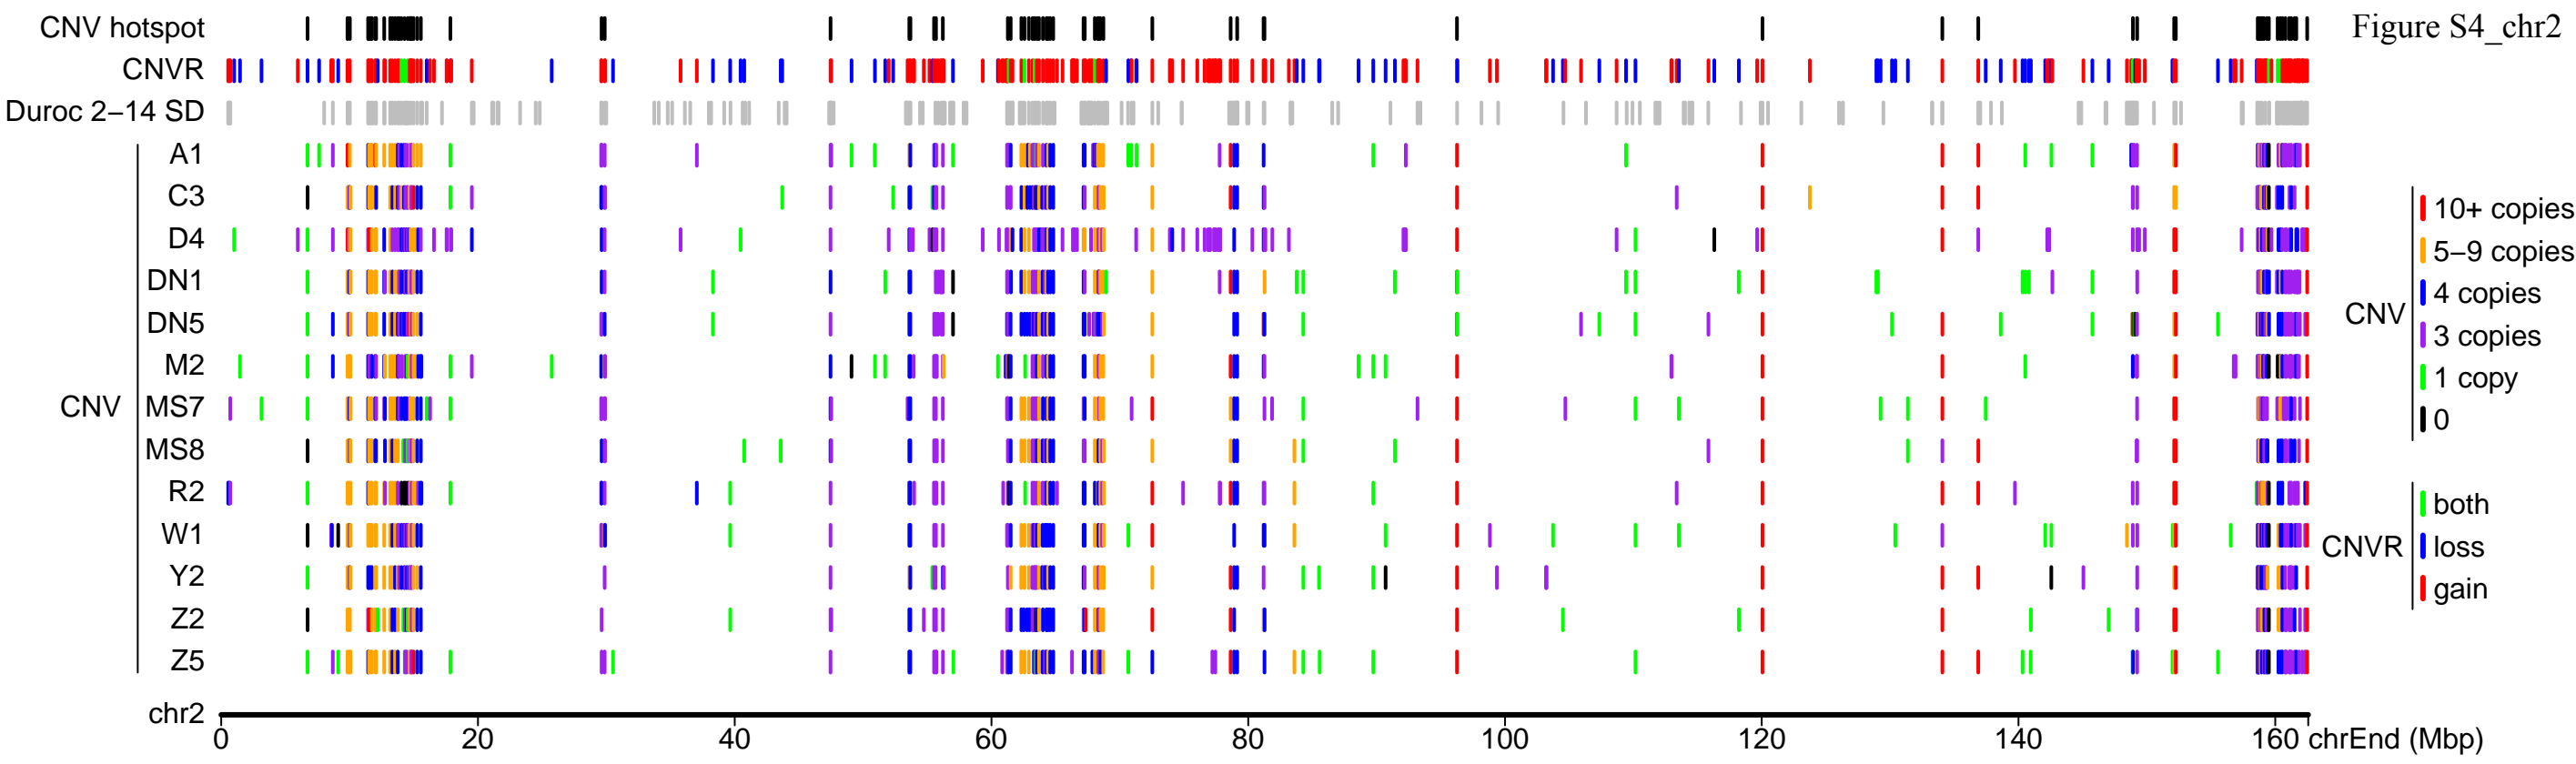







Figure S4\_chr5

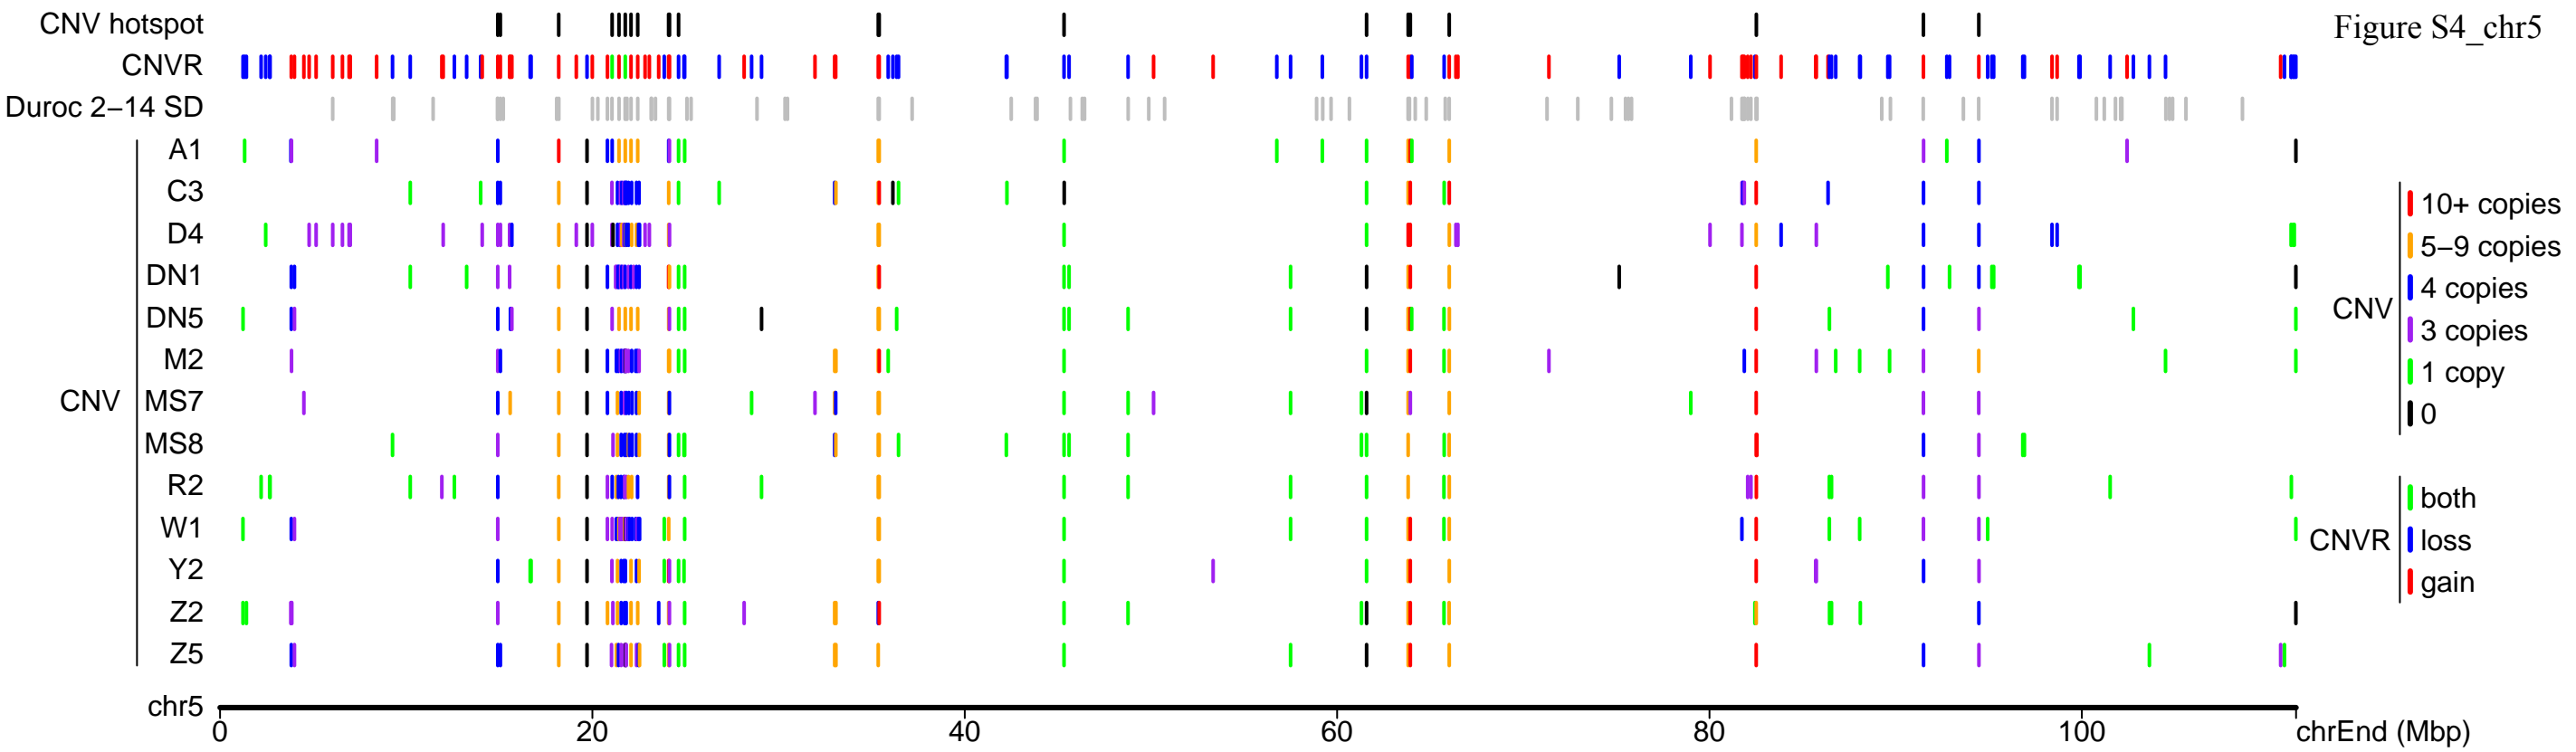

Figure S4\_chr6

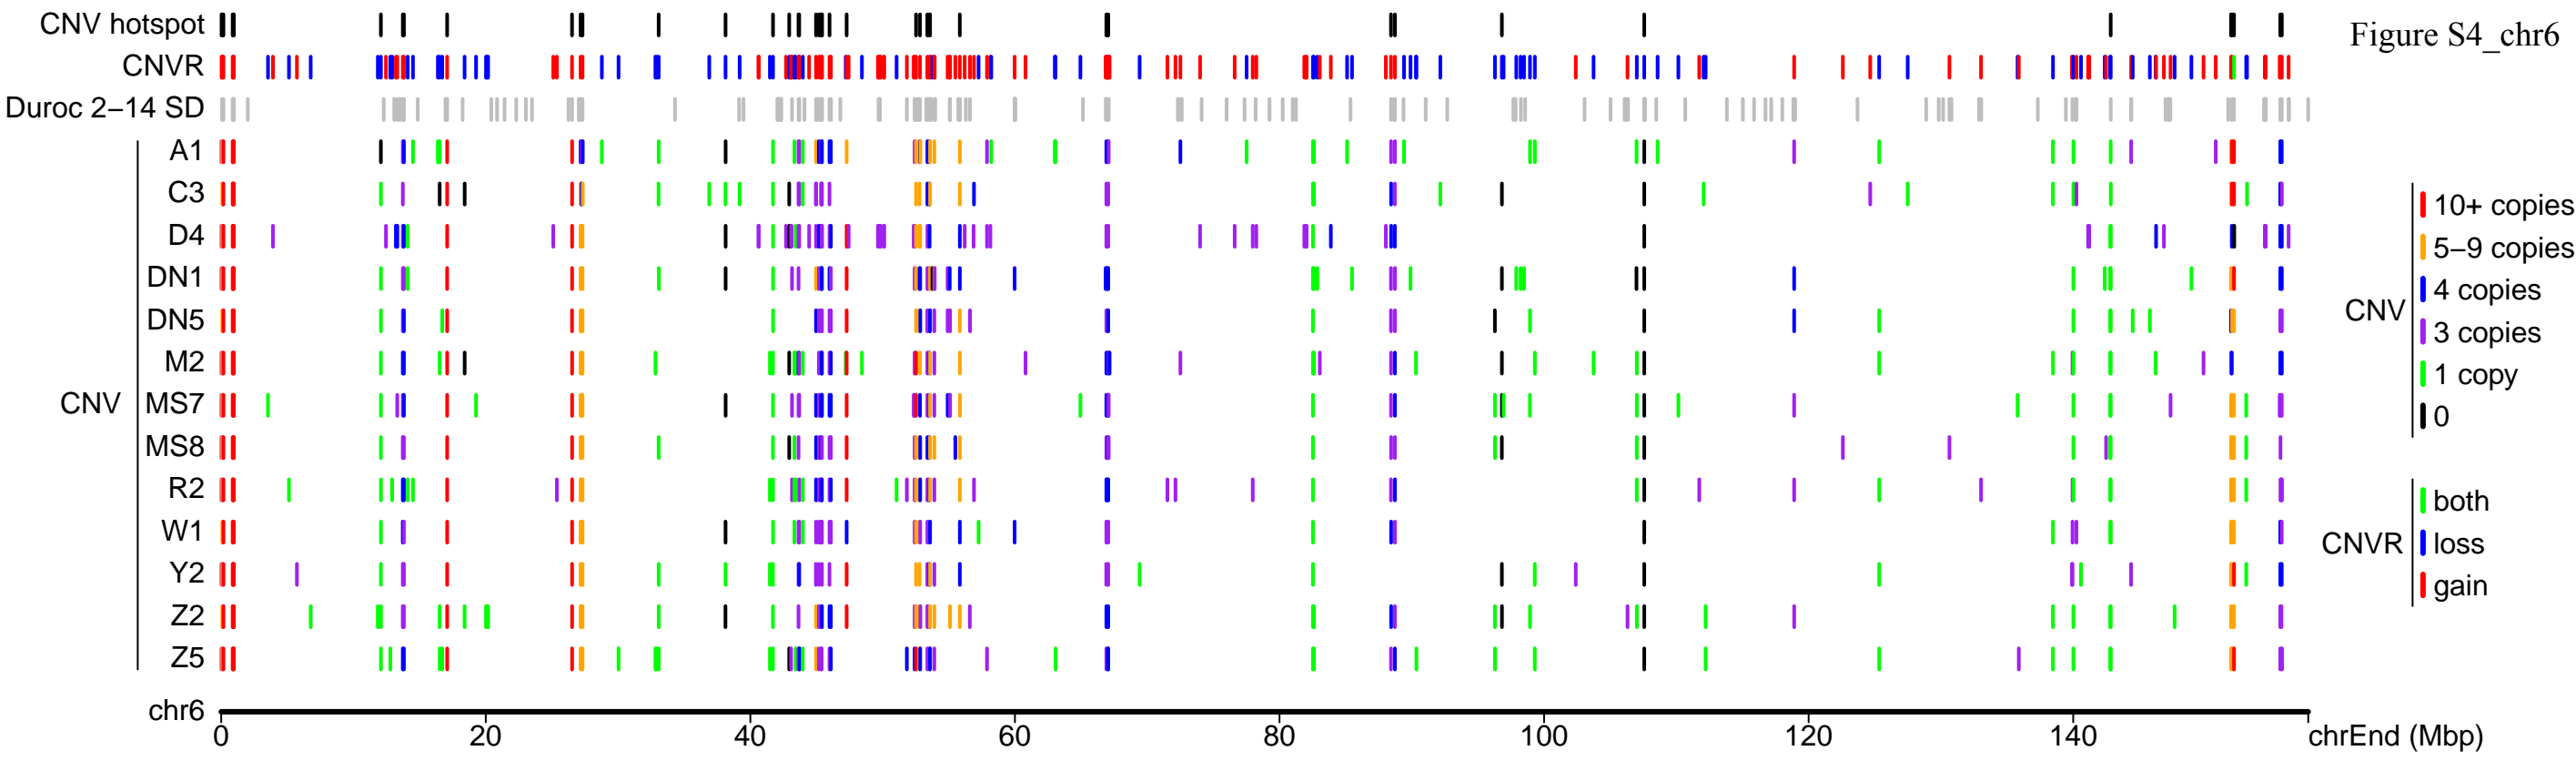

Figure S4\_chr7

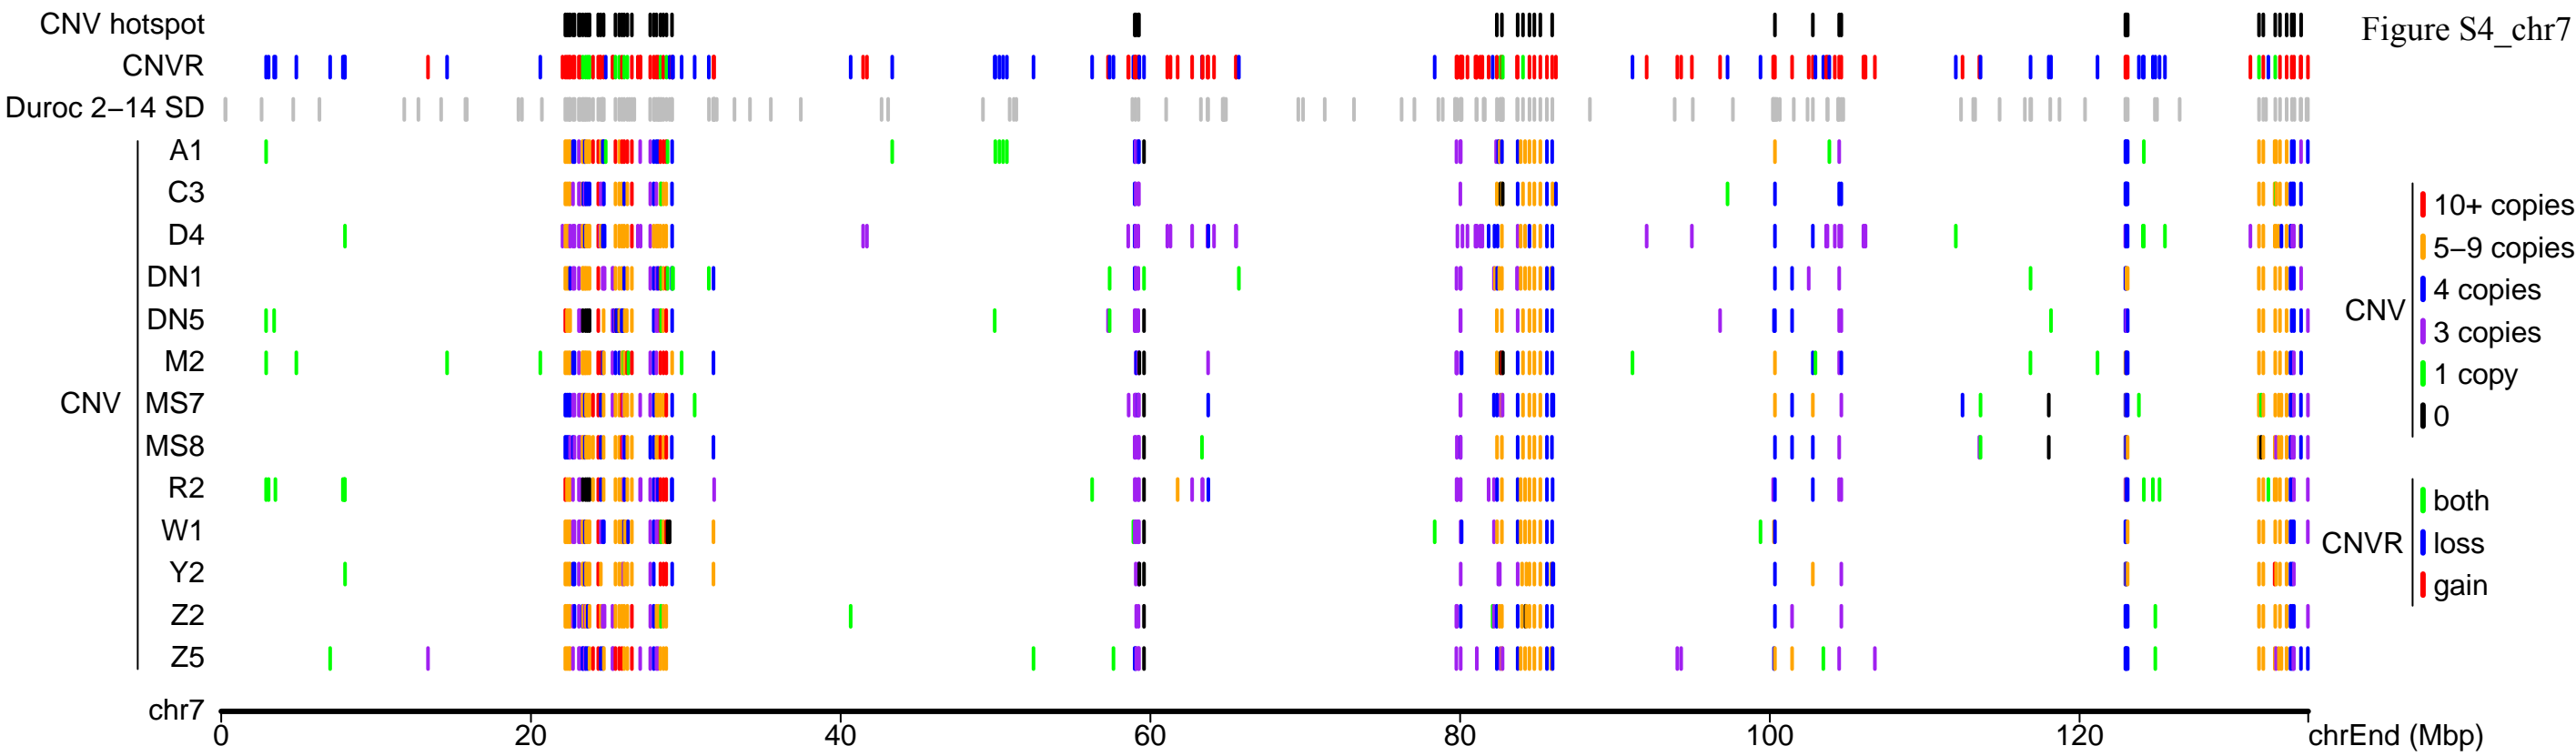

Figure S4\_chr8

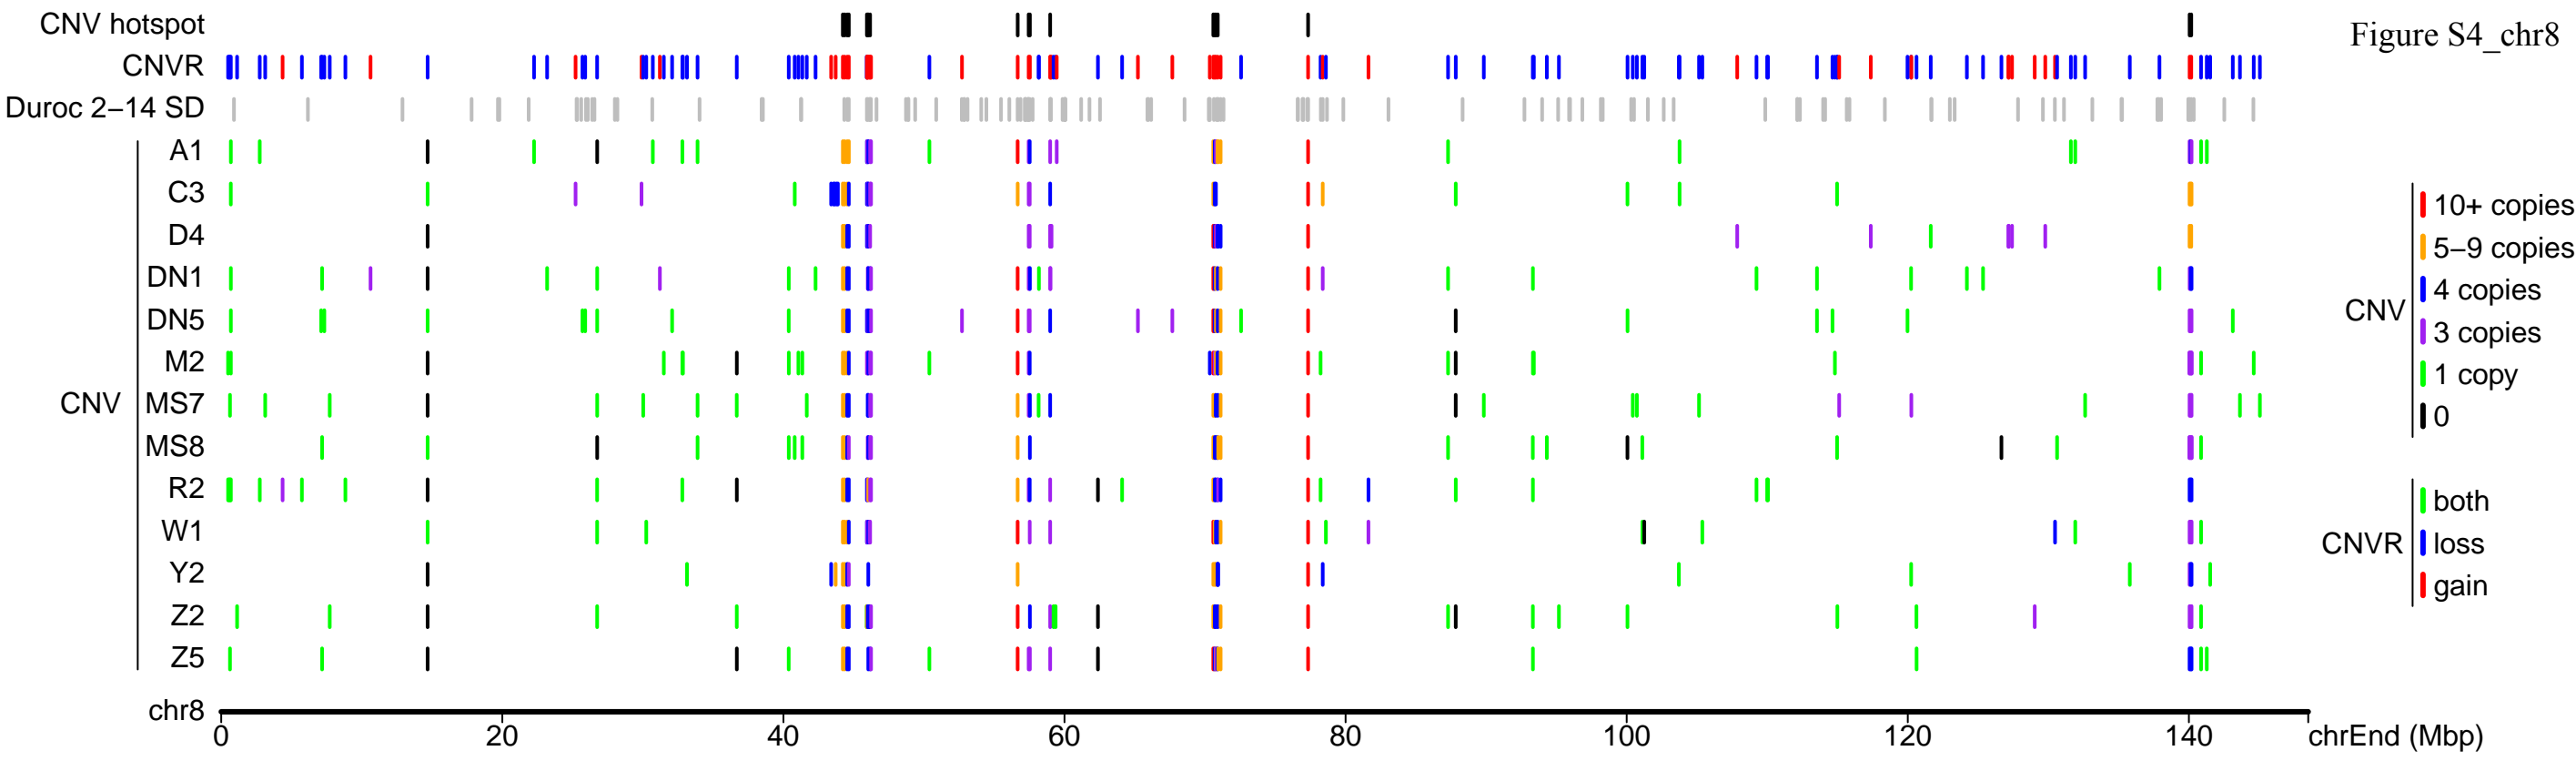

Figure S4\_chr9

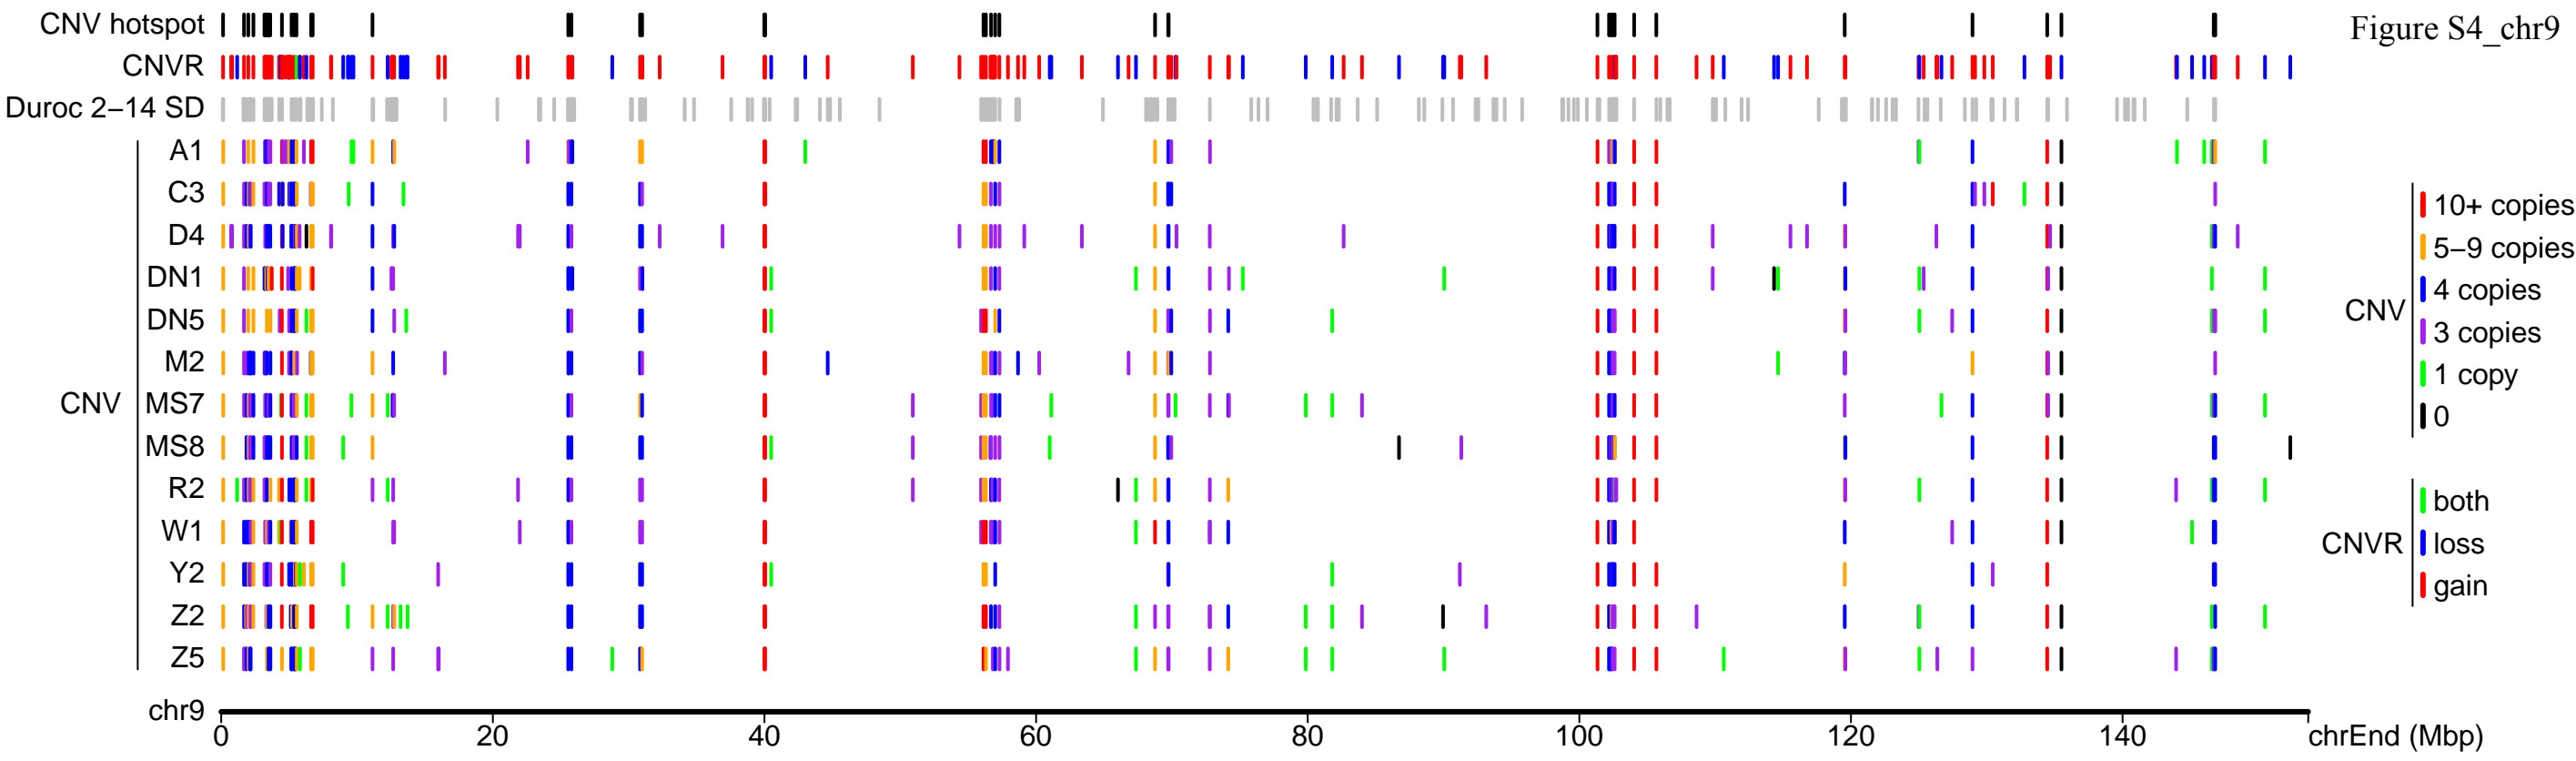

Figure S4\_chr10

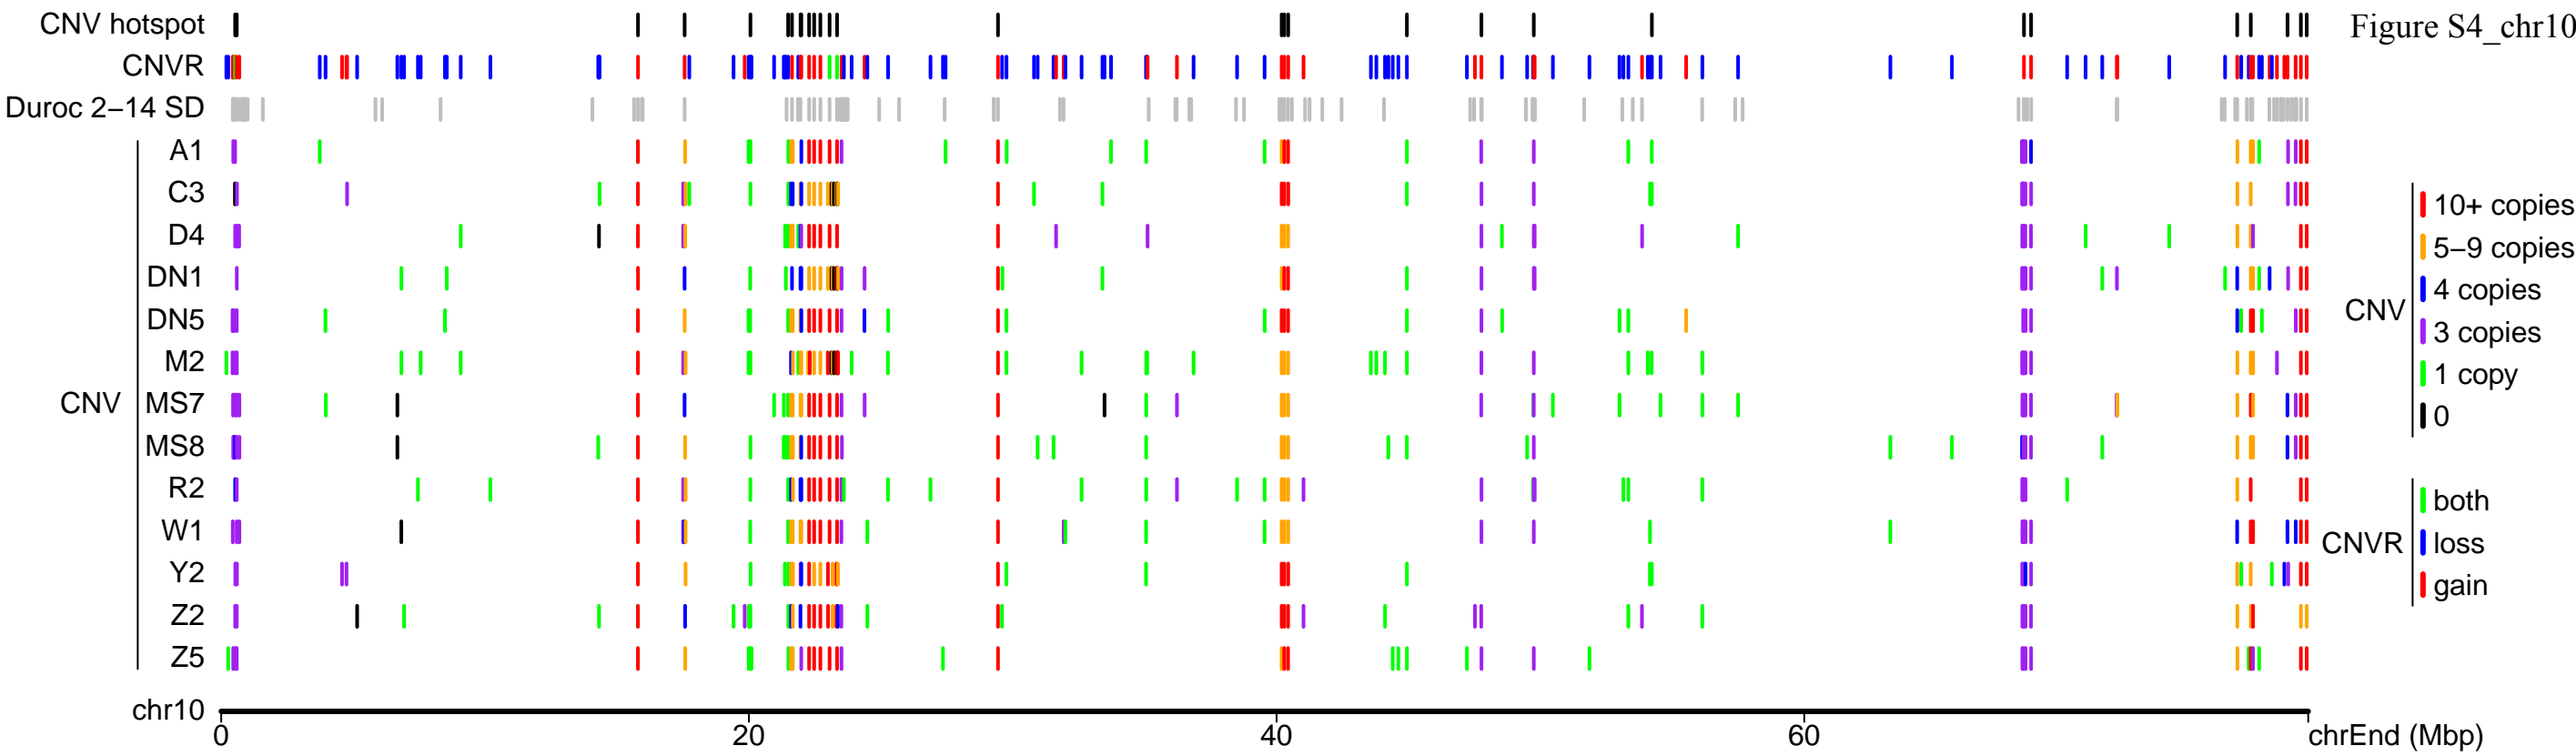

chr10 0 20 40 60 chrEnd (Mbp)

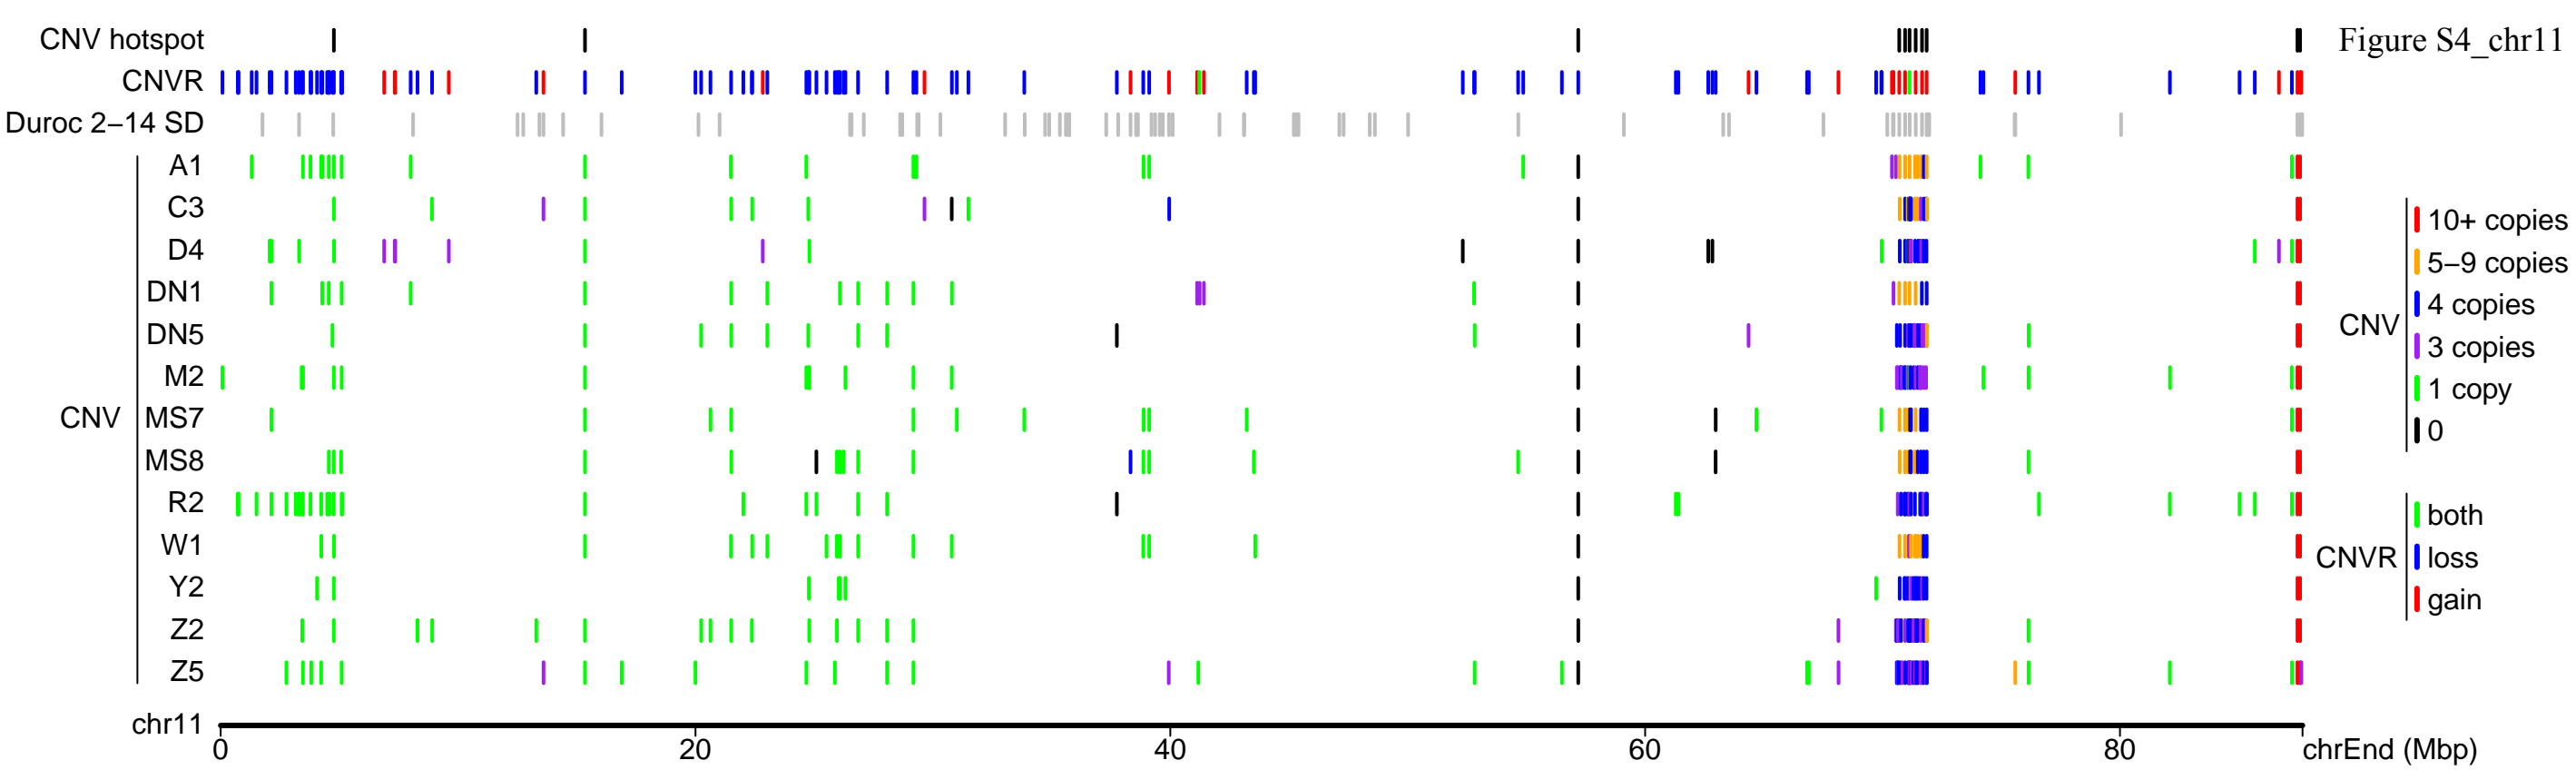

Figure S4\_chr12

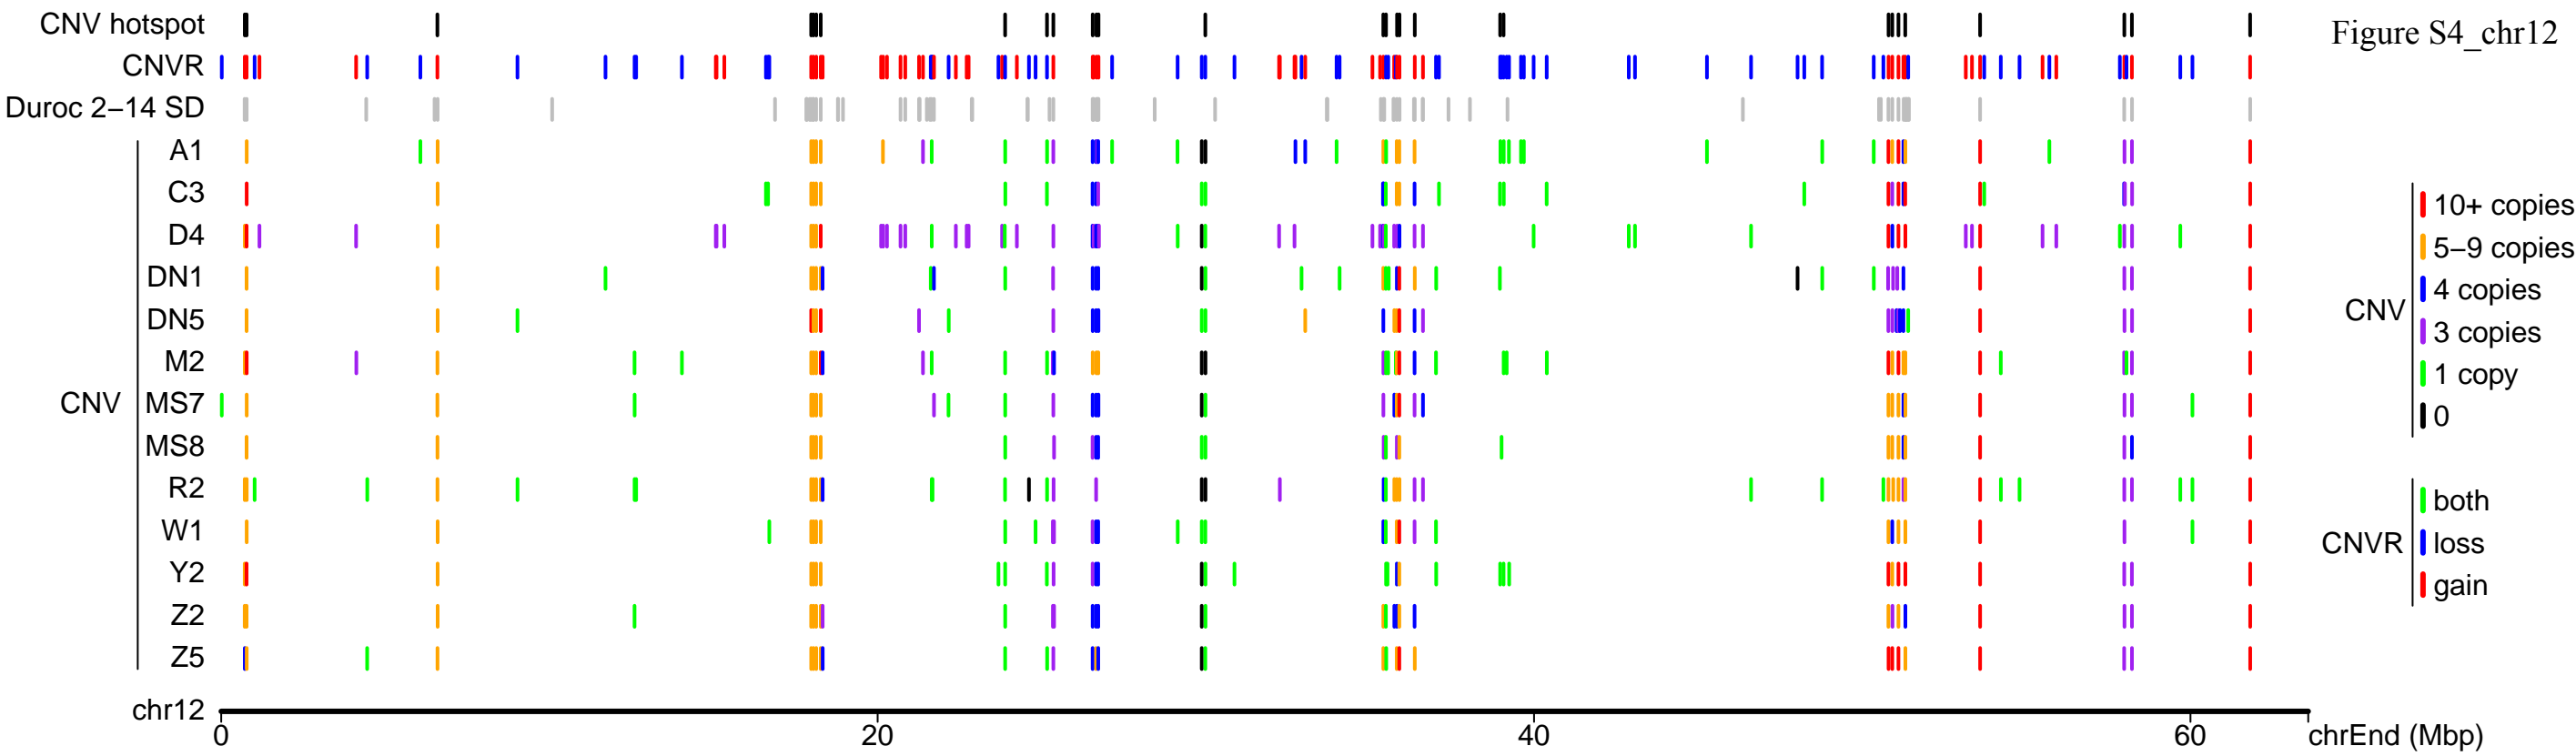



Figure S4\_chr13

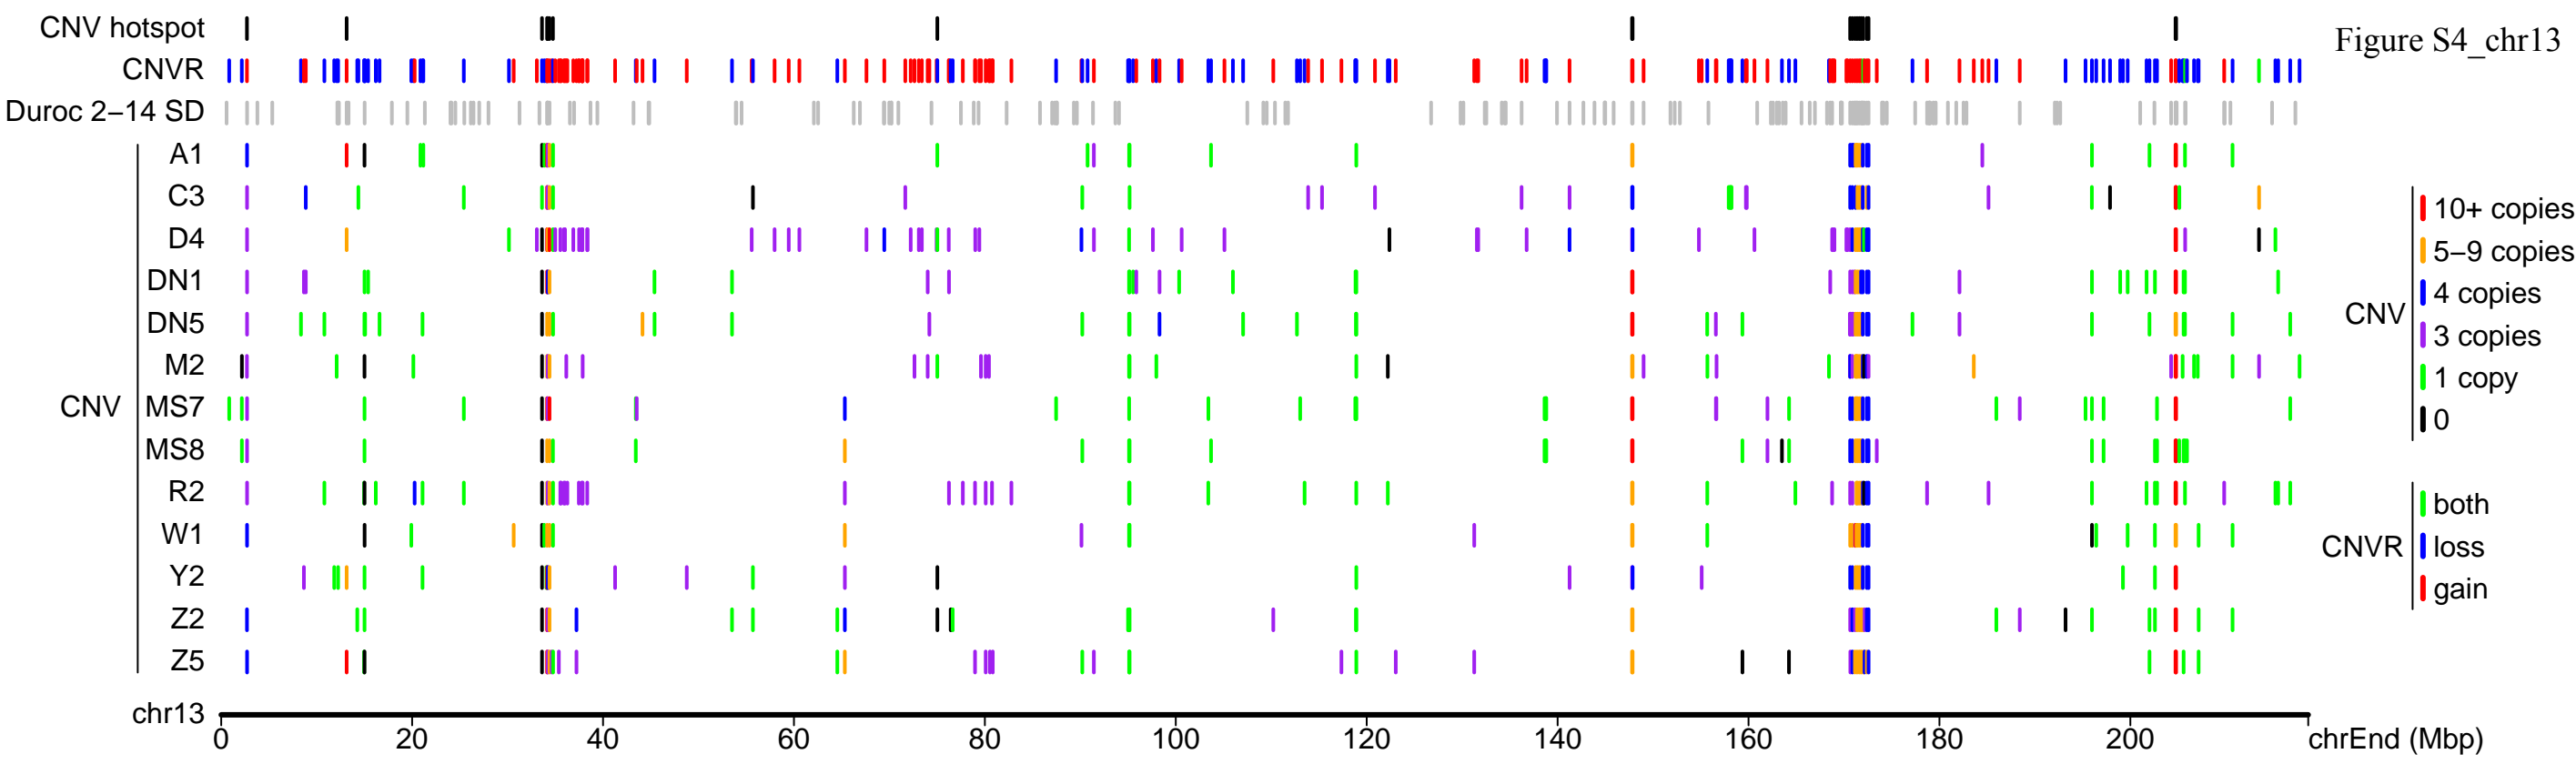



Figure S4\_chr15

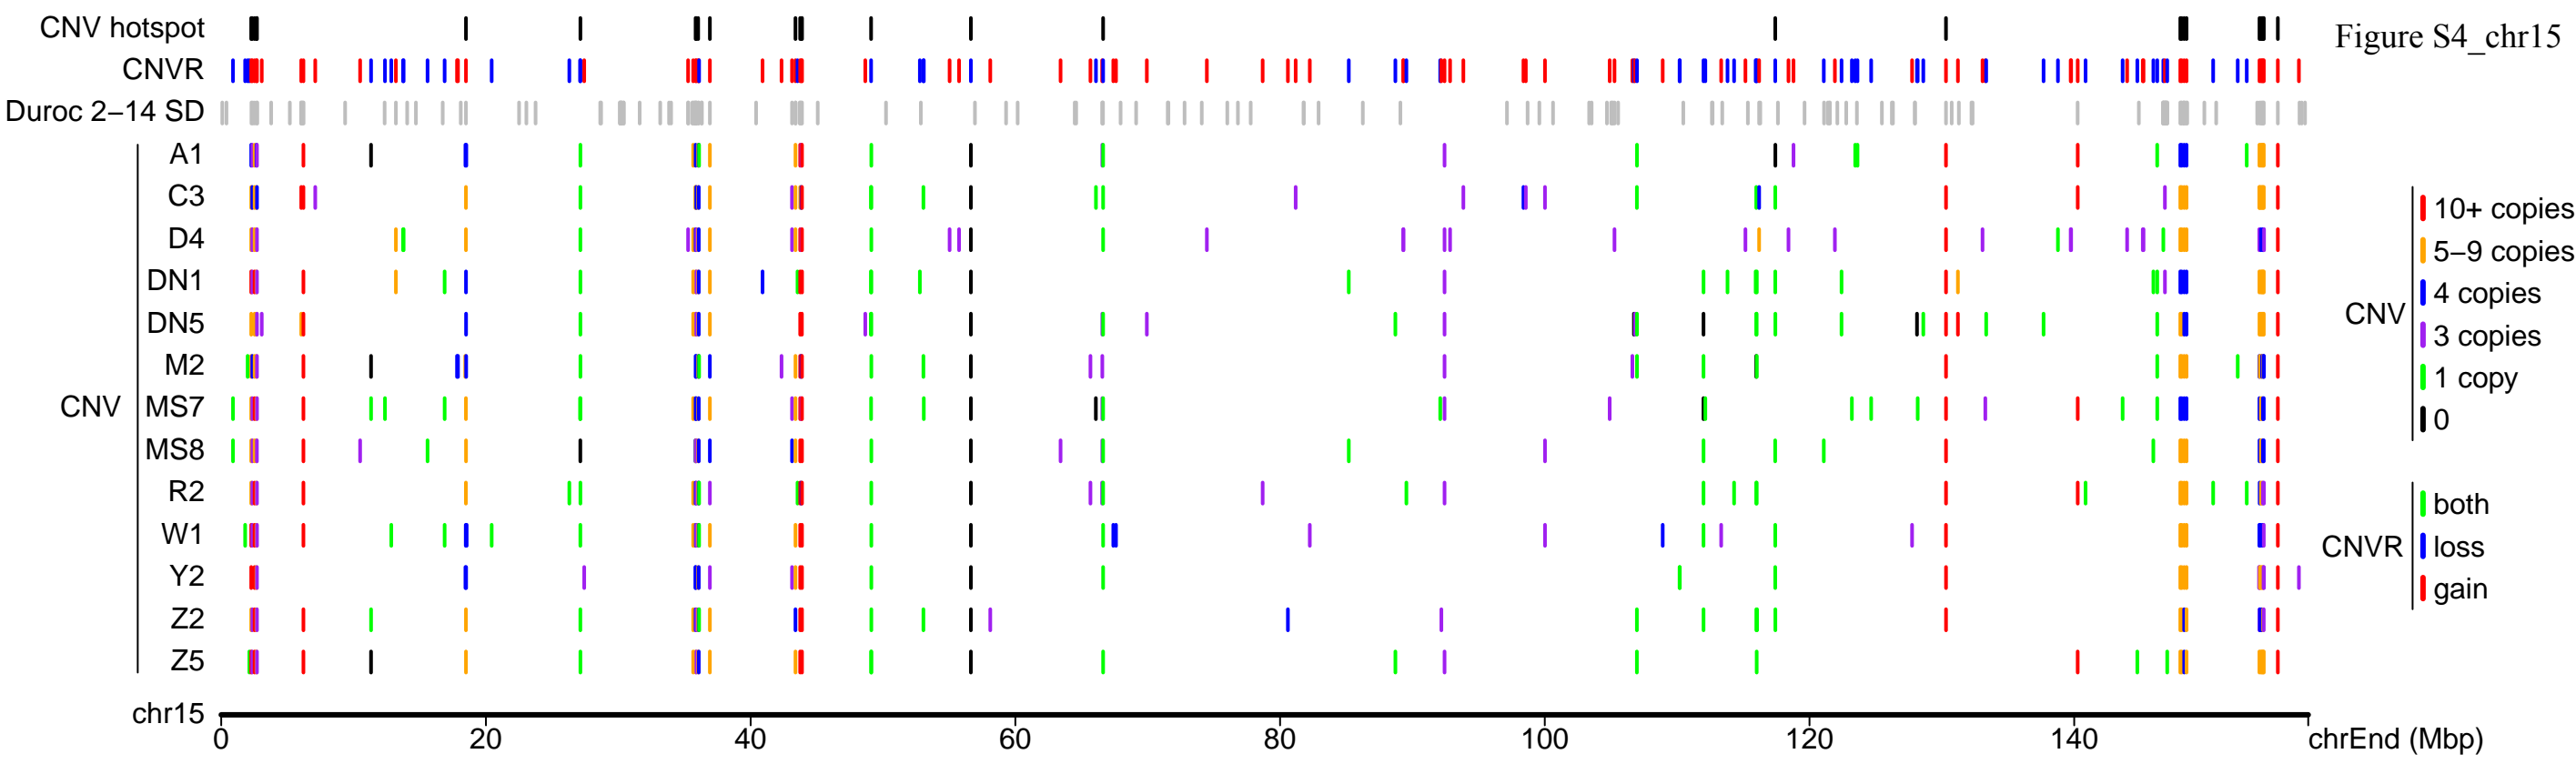



Figure S4\_chr17

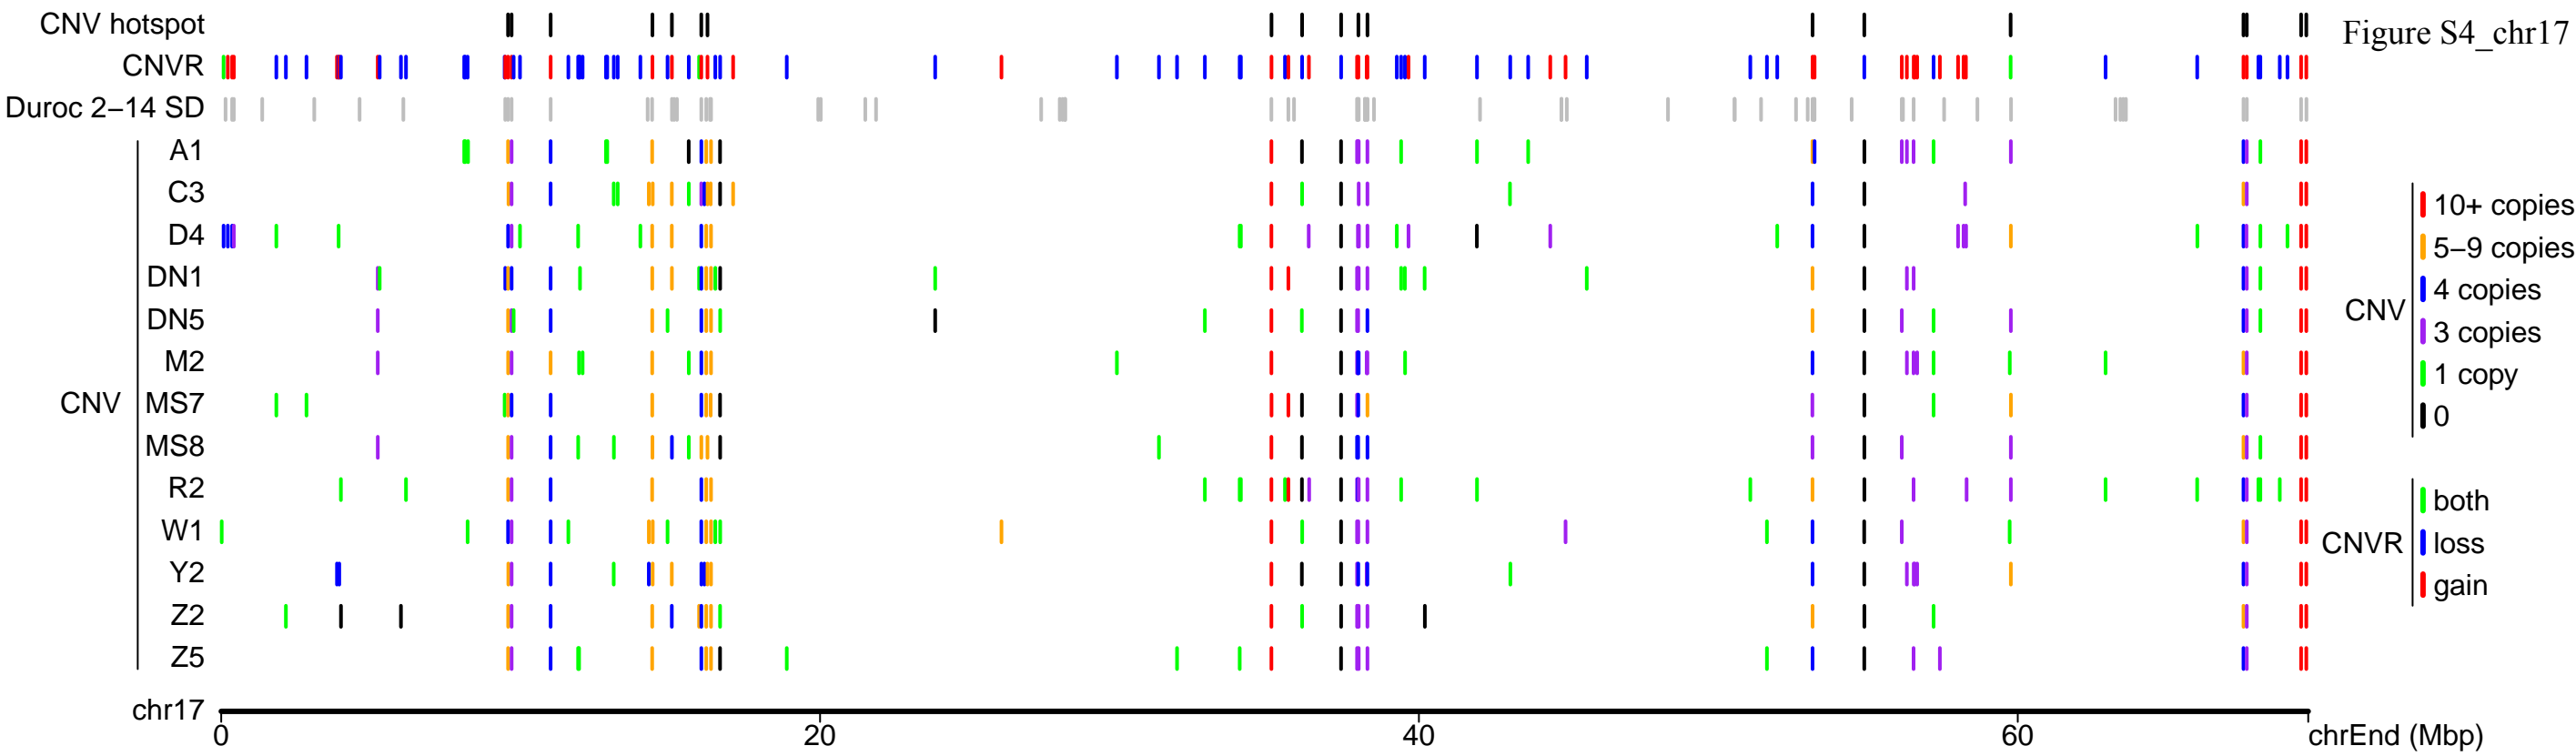

Figure S4\_chr18

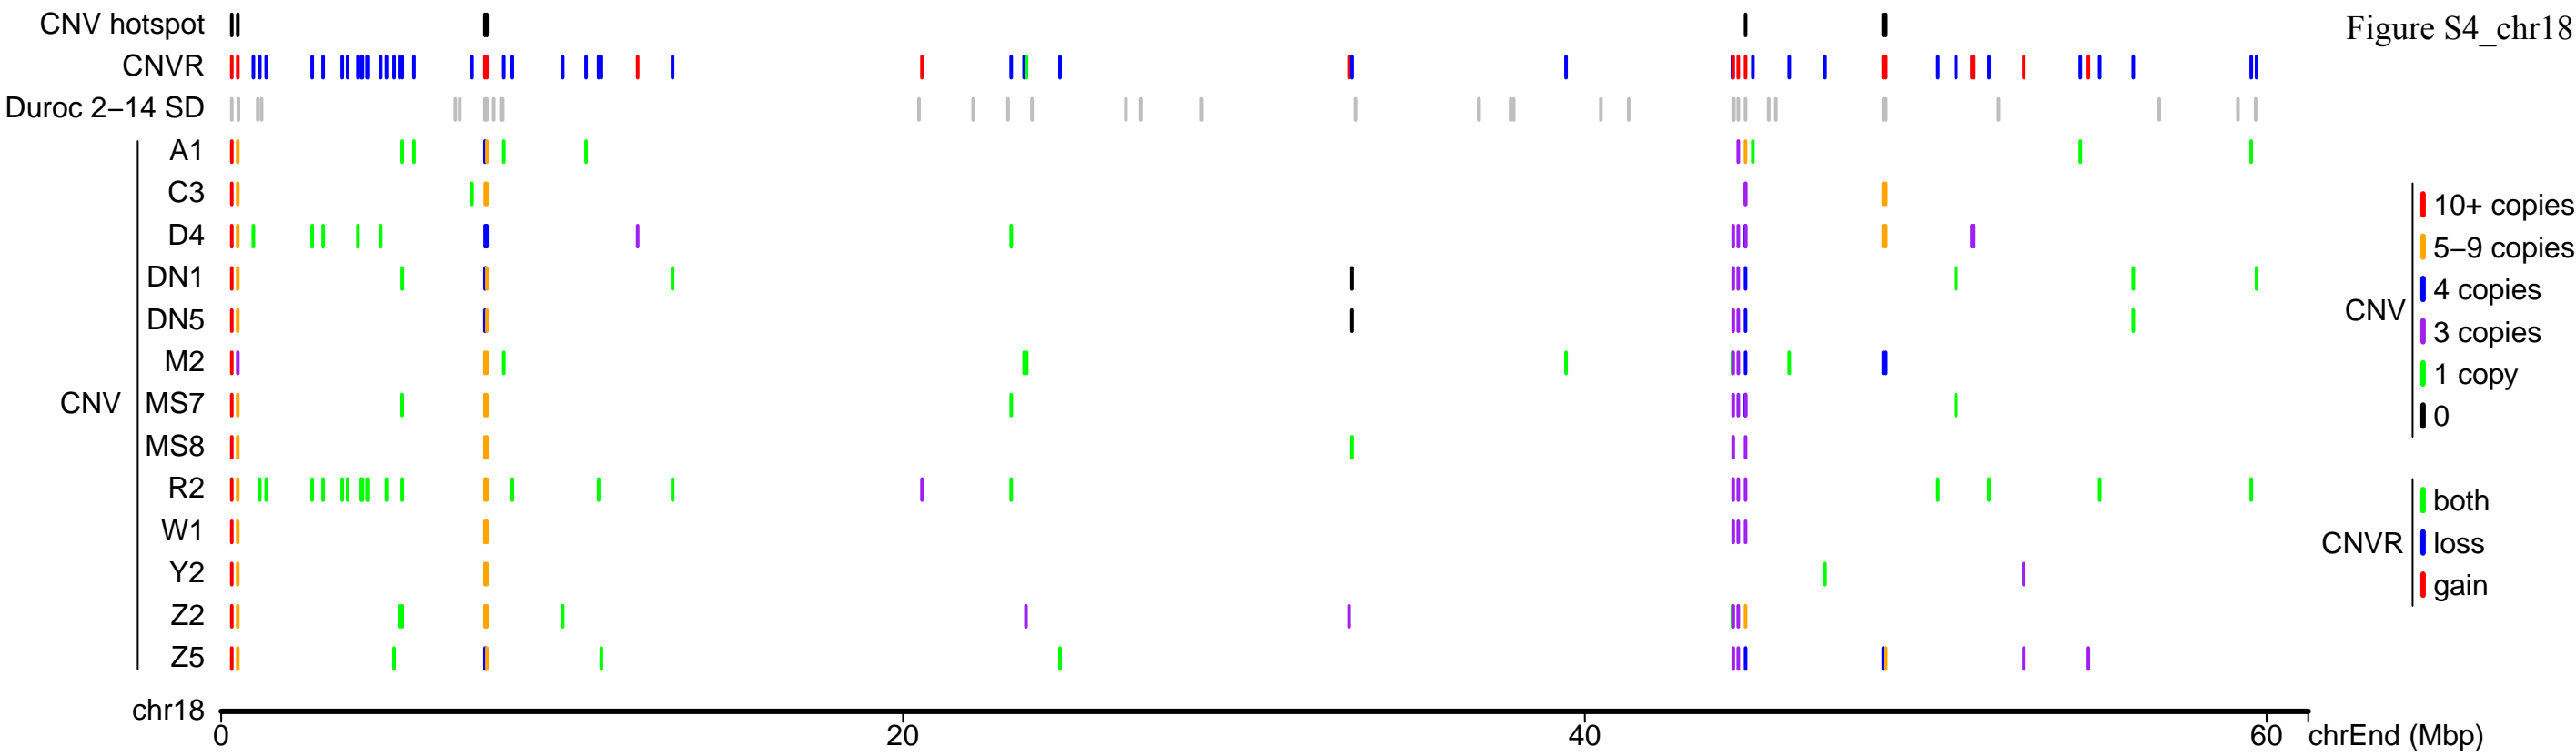

Figure S4\_chrX

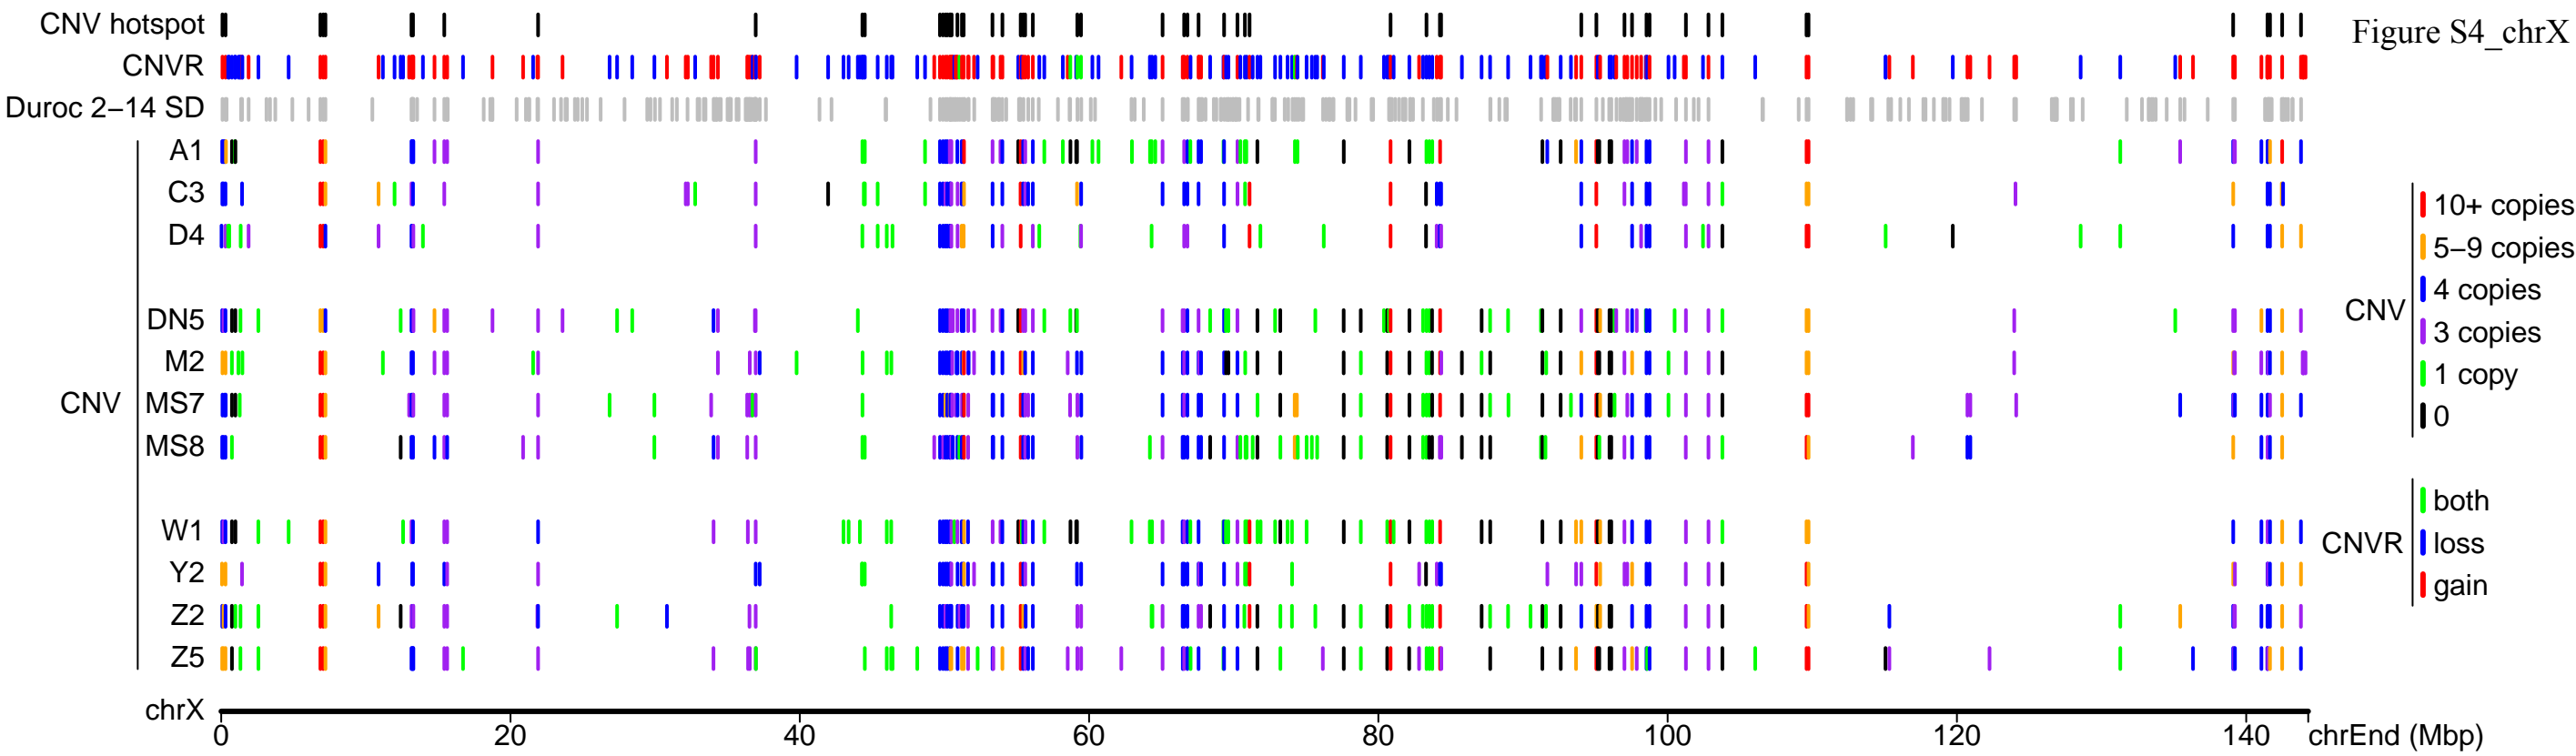

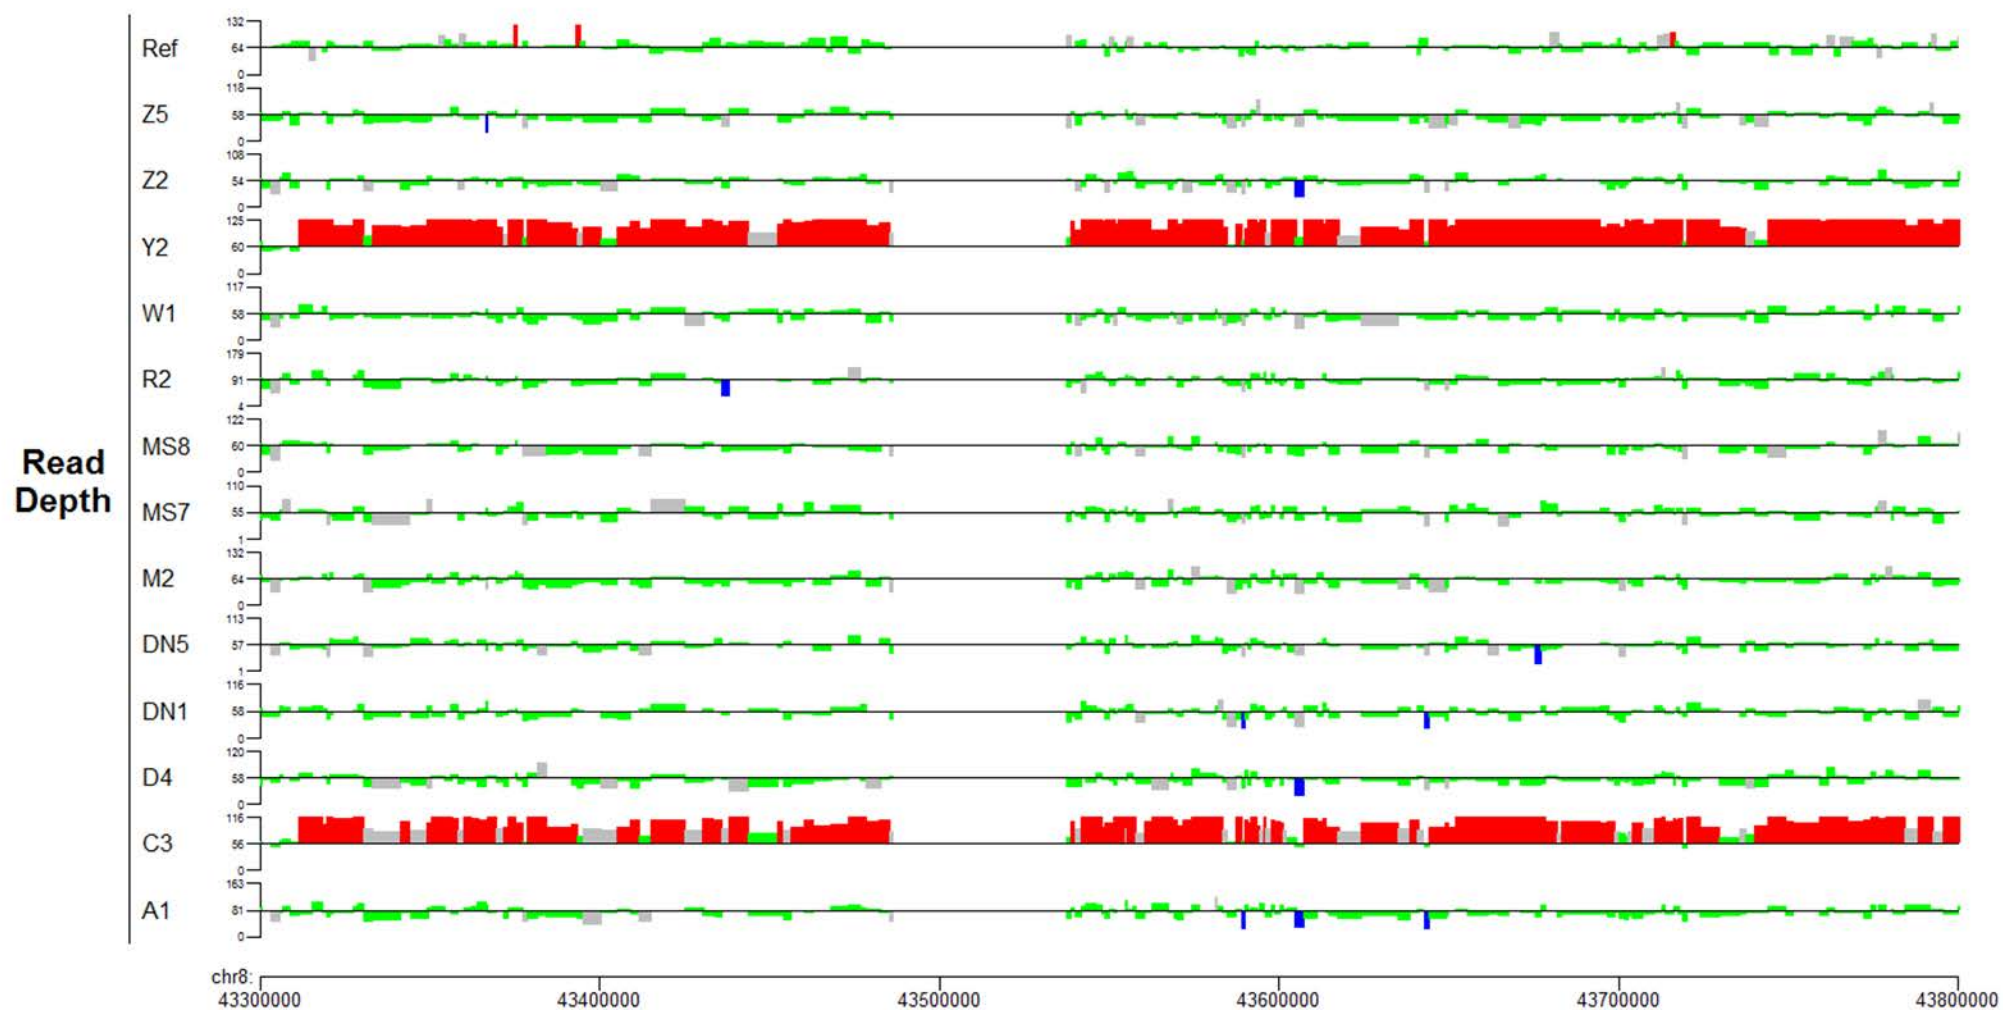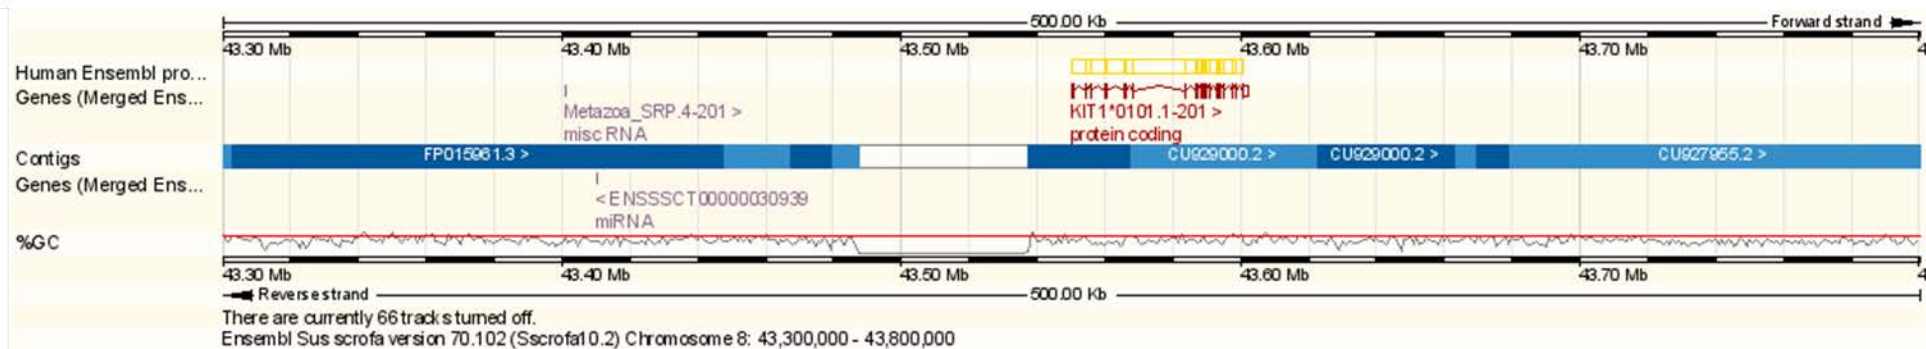



Figure S6

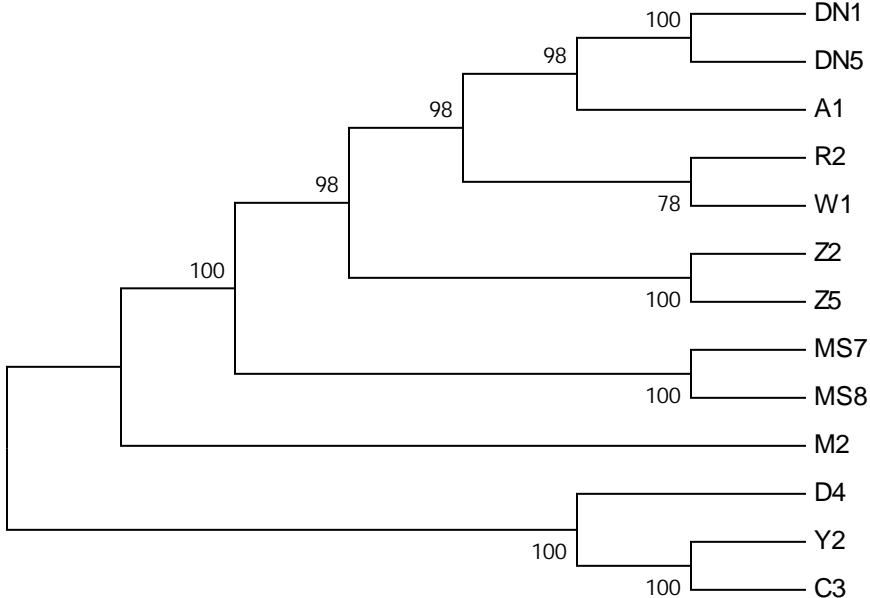

Supplement: 12864_2014_6278_MOESM2_ESM.pdf [file 12864_2014_6278_MOESM2_ESM.pdf]
